# Supplementary material for: Palladium catalyzed synthesis of poly-substituted and poly-functionalised conjugated 1,3-dienes from allyl bromides and α-diazoesters
Source: Royal Society of Chemistry journal article supplement (doi:10.1039/d2nj03460c), 2022-01-01

**Palladium Catalyzed Synthesis of Poly-substituted and Poly-functionalised  
Conjugated 1,3-Dienes from Allyl Bromides and  $\alpha$ -Diazoesters.**

Hilal Ahmad Khan, Vikiho Wotsa, Lavanya. J and Chinnappan Sivasankar\*

\*Catalysis and Energy Laboratory, Department of Chemistry, Pondicherry University , R. V.  
Nagar, Puducherry 605 014, India.

Table of contents

|                                            |      |
|--------------------------------------------|------|
| X-Ray Crystallographic Data for <b>3a</b>  | 3    |
| <sup>1</sup> H and <sup>13</sup> C spectra | 3-29 |

### X-Ray Crystallographic Data for 3a:

The structure of **3a** was also determined by x-ray analysis. The single crystal for the analysis was grown by slow evaporation of solution of **3a** in hexane-ethylacetate mixture. X Ray Crystallography: CCDC2149586 contains the supplementary crystallographic data for this paper. The data can be obtained free of charge from the Cambridge Crystallographic Data Centre via [www.ccdc.cam.ac.uk/data\\_request/cif](http://www.ccdc.cam.ac.uk/data_request/cif).

### Crystal data and structure refinement Compound 3a

Formula: C<sub>20</sub> H<sub>18</sub>O<sub>4</sub>

Formula weight: 322.34 g/mol

Wave length: = 0.71073 Å

Crystal system: triclinic

Space group: P -1

Color of crystal: colourless

Unit cell parameters: a = 9.8517(5) Å                      α = 86.084(2)°

b = 10.0871(5) Å                                      β = 71.973(2)°

c = 10.0861(5) Å                                      γ = 64.392(2)°

Temperature of data collection: 300(2) K

Values of Z, R, GOF:

$$Z = 2$$

$$R(\text{reflections}) = 0.0443(2849), \quad wR2(\text{reflections}) = 0.1151(3478)$$

$$\text{GOF} = 1.035$$

Measurement device type: Bruker D8 goniometer

Computing structure solution: SHELXT 2018/2 (Sheldrick, 2018)

Computing structure refinement: SHELXL-2018/3 (Sheldrick, 2018)

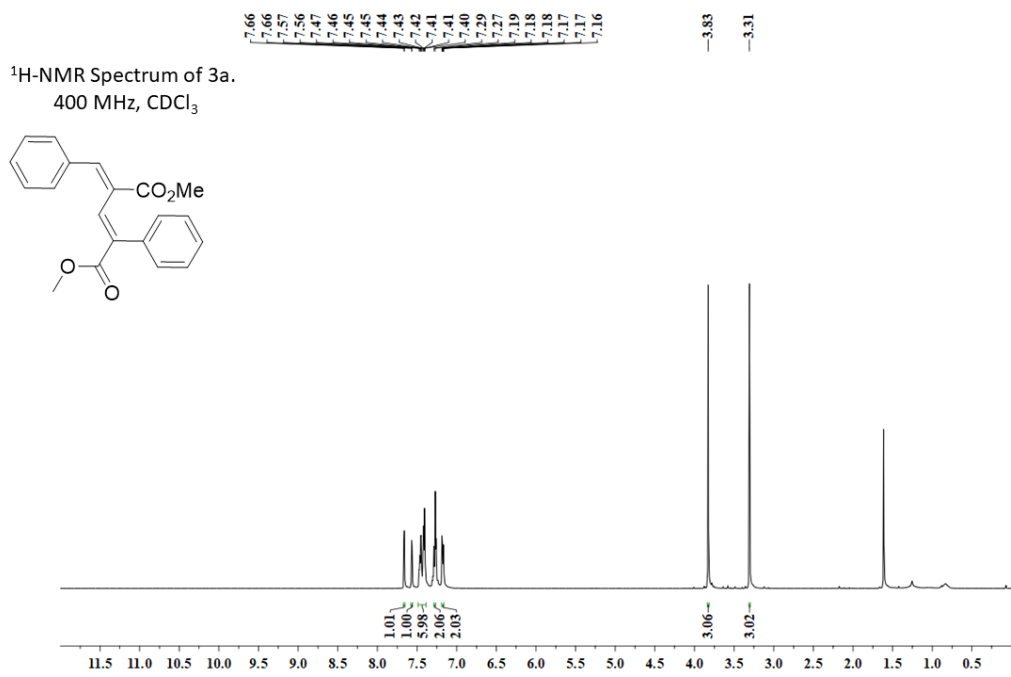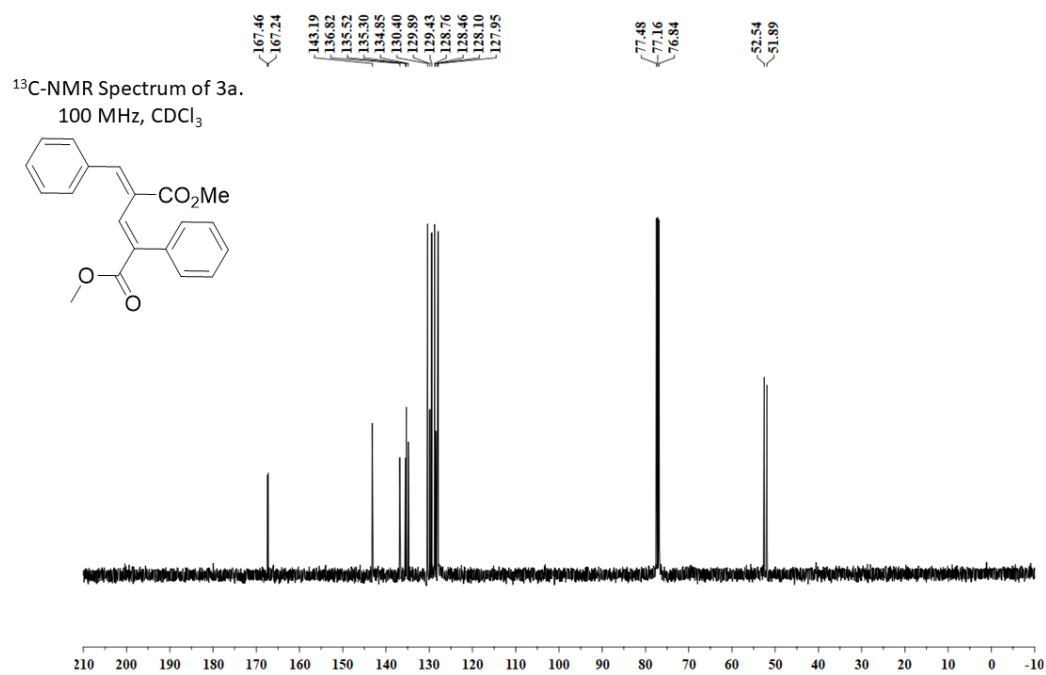

<sup>1</sup>H-NMR MHz of 3b.  
400 MHz, CDCl<sub>3</sub>

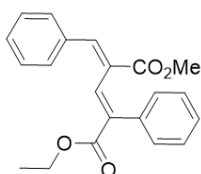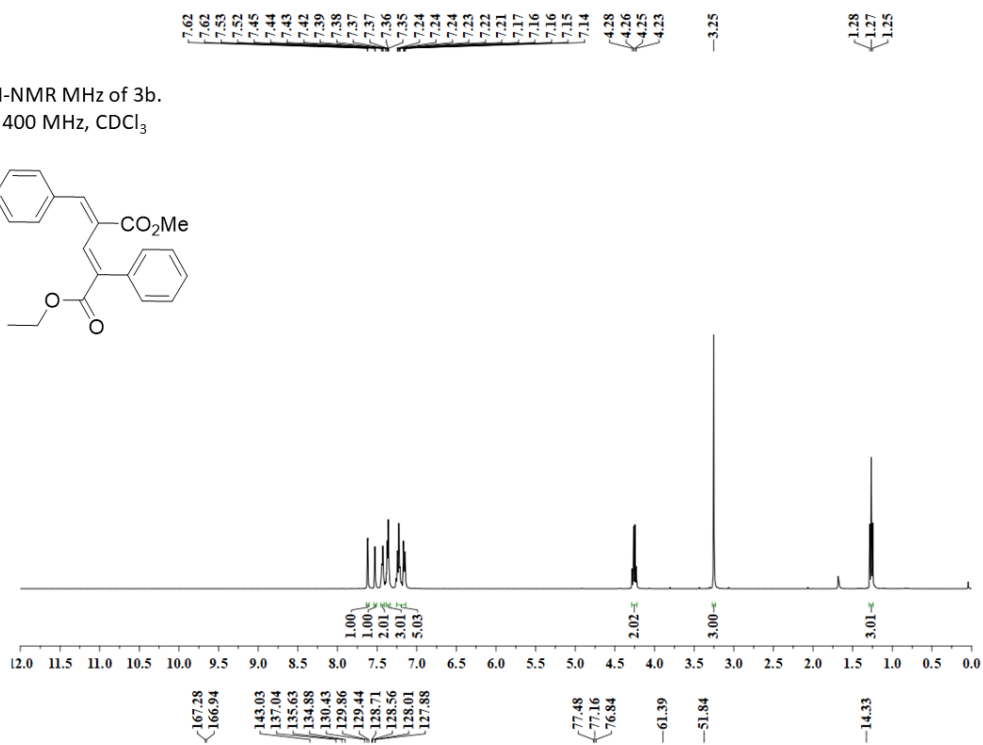

<sup>13</sup>C-NMR spectrum of 3b.  
100 MHz, CDCl<sub>3</sub>

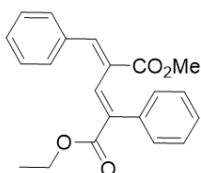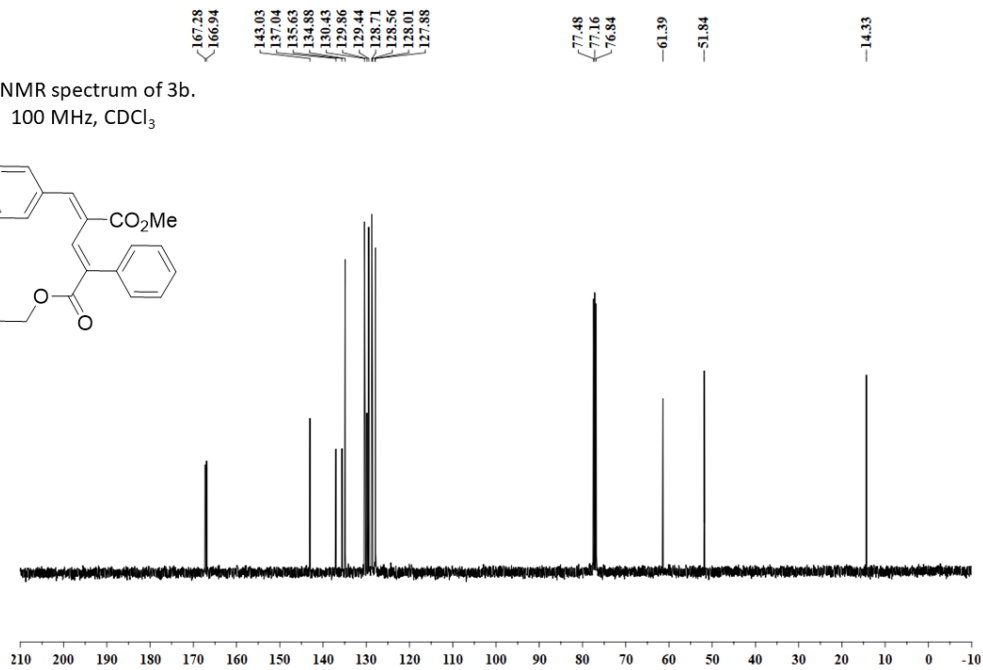

<sup>1</sup>H-NMR spectrum of 3c.  
400 MHz, CDCl<sub>3</sub>

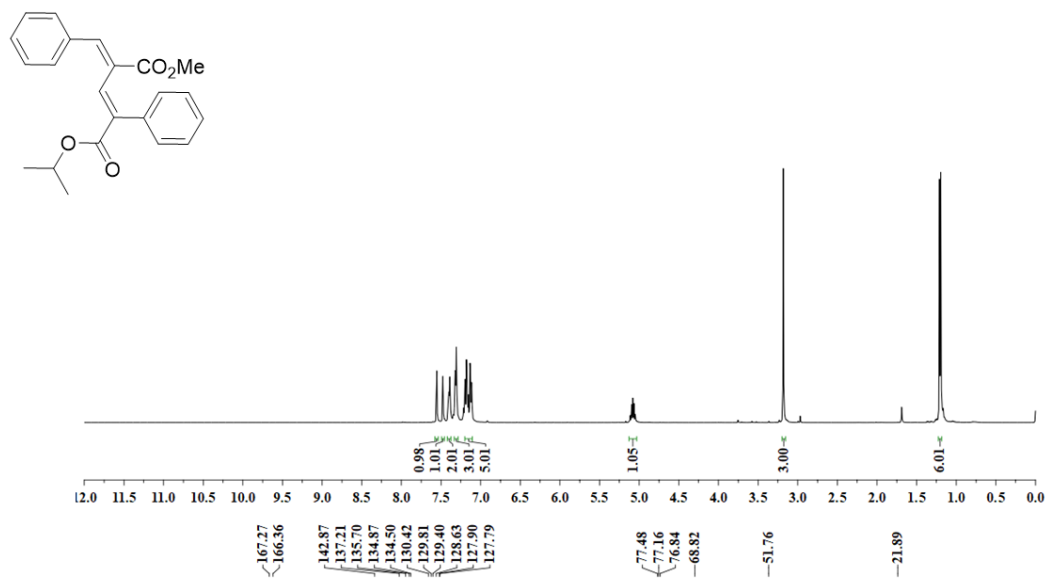

<sup>13</sup>C-NMR spectrum of 3c.  
100 MHz, CDCl<sub>3</sub>

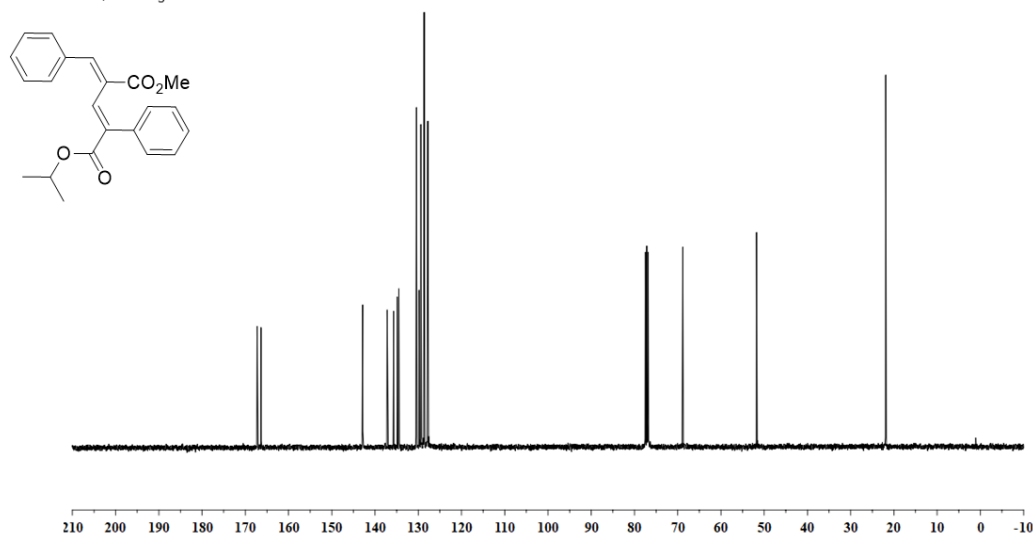

<sup>1</sup>H-NMR spectrum of 3d.  
400 MHz, CDCl<sub>3</sub>

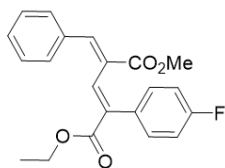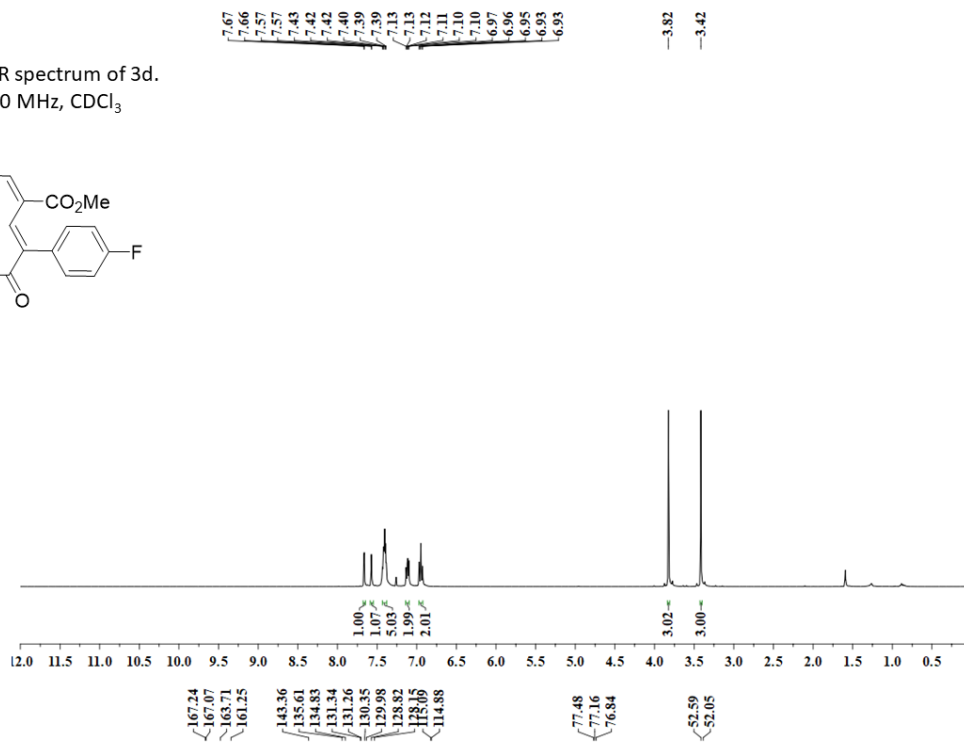

<sup>13</sup>C-NMR spectrum of 3d.  
100 MHz, CDCl<sub>3</sub>

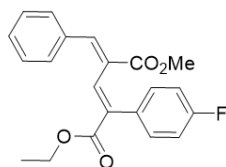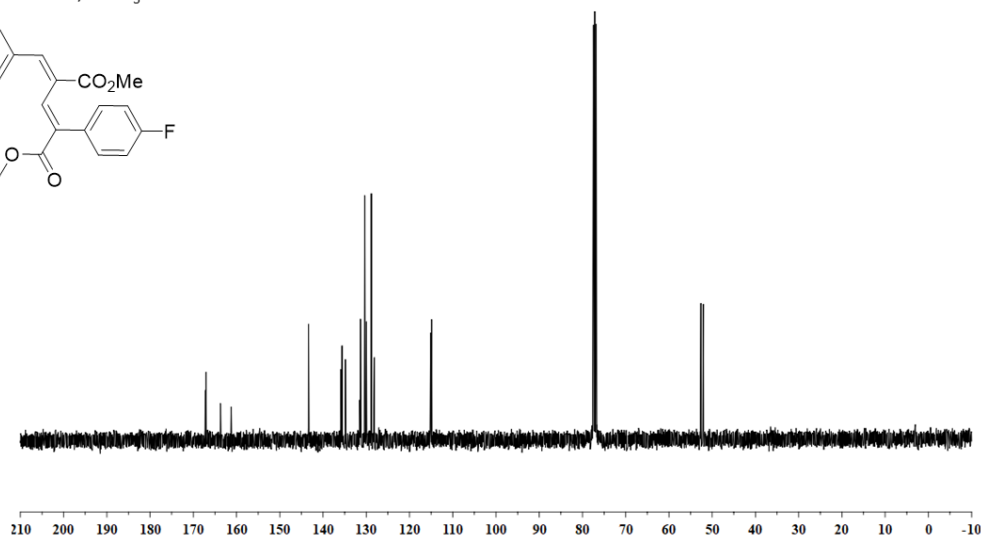

7.70  
7.70  
7.60  
7.59  
7.57  
7.55  
7.46  
7.45  
7.44  
7.43  
7.42  
7.41  
7.25  
7.24  
7.23  
7.21  
7.17  
7.15  
7.13  
7.08  
7.06  
-3.81  
-3.40

<sup>1</sup>H-NMR spectrum of 3e.  
400 MHz, CDCl<sub>3</sub>

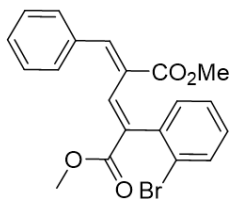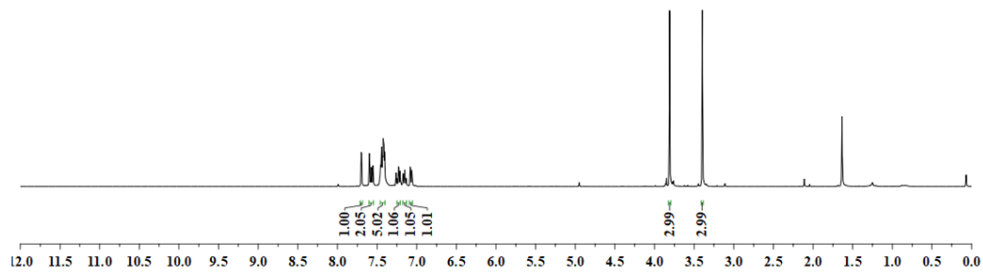

167.27  
166.87  
143.81  
136.60  
136.51  
136.23  
134.64  
132.70  
131.33  
130.58  
130.10  
129.76  
128.89  
127.73  
127.24  
124.40  
77.48  
77.46  
76.84  
52.75  
52.07

<sup>13</sup>C-NMR spectrum of 3e.  
100 MHz, CDCl<sub>3</sub>

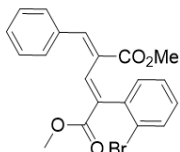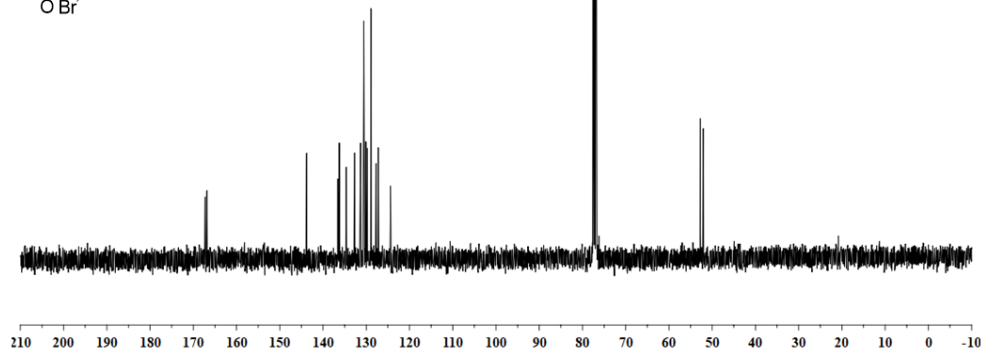



7.72  
7.71  
7.58  
7.58  
7.46  
7.45  
7.44  
7.44  
7.43  
7.42  
7.41  
7.41  
7.40  
7.39  
7.36  
7.36  
7.34  
7.34  
7.24  
7.23  
7.22  
7.21  
7.20  
7.20  
7.18  
7.18  
7.16  
7.16  
7.14  
7.14  
7.08  
7.08  
4.31  
4.29  
4.28  
4.26  
-3.40  
-1.29  
-1.27  
-1.26

<sup>1</sup>H-NMR spectrum of 3f.  
400 MHz, CDCl<sub>3</sub>

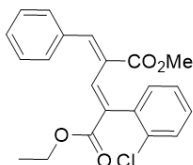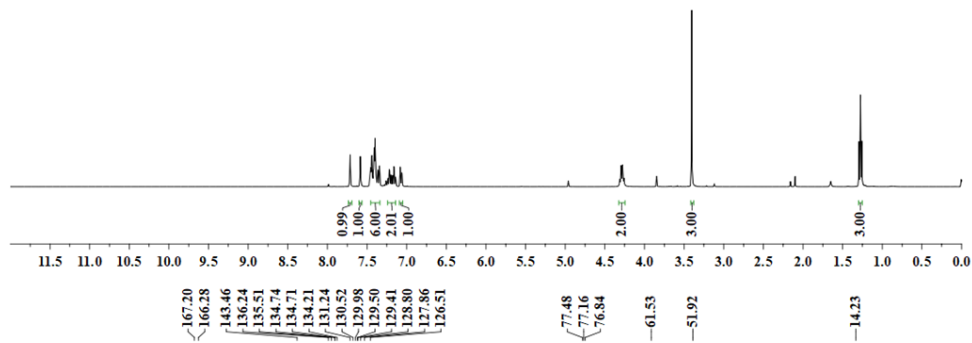

<sup>13</sup>C-NMR spectrum of 3f.  
100 MHz, CDCl<sub>3</sub>

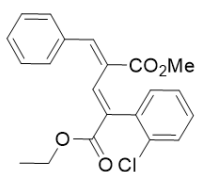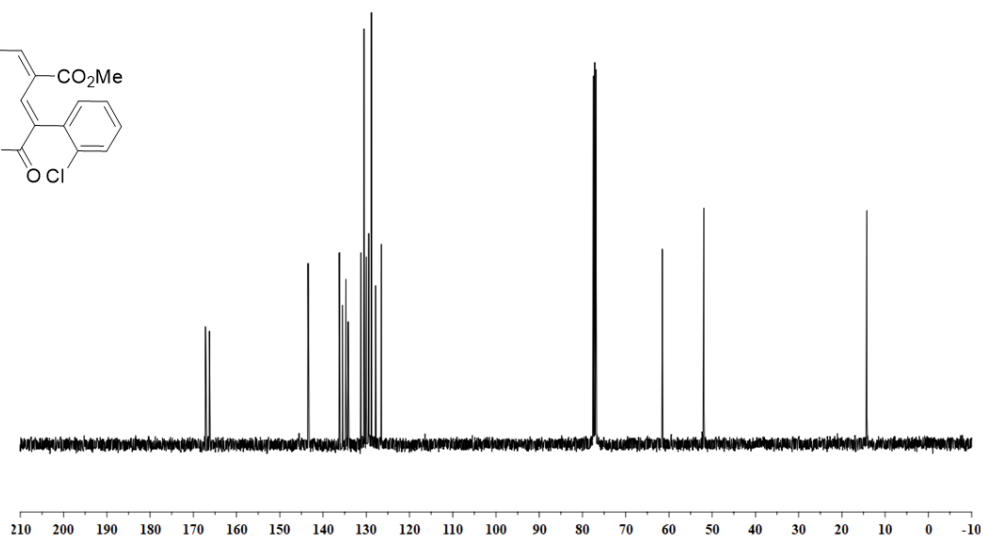

<sup>1</sup>H-NMR spectrum of 3g.  
400 MHz, CDCl<sub>3</sub>

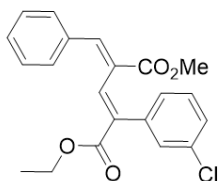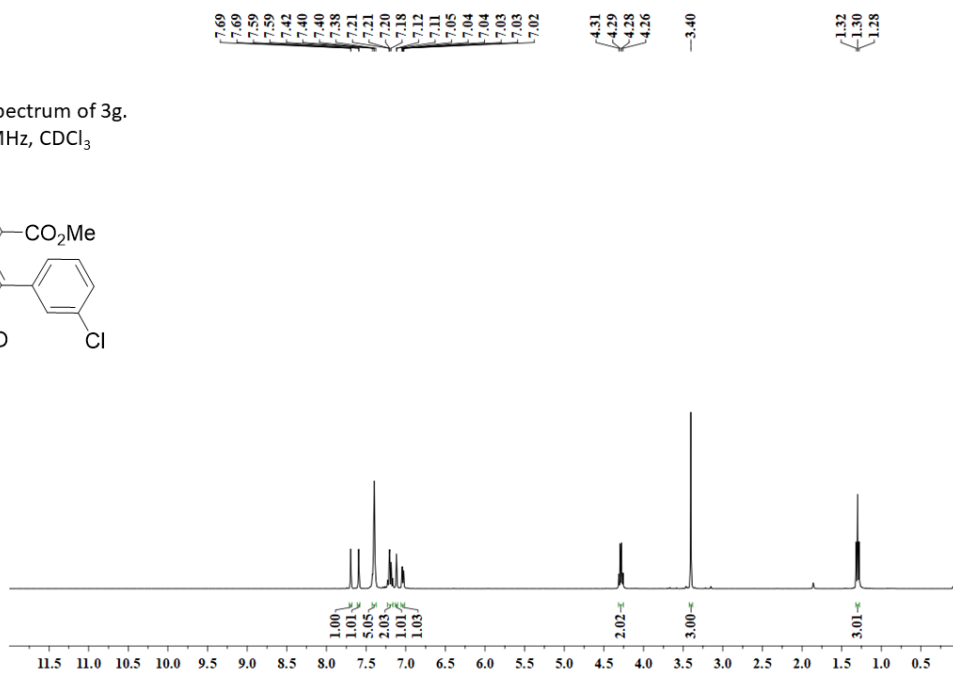

<sup>13</sup>C-NMR spectrum of 3g.  
100 MHz, CDCl<sub>3</sub>

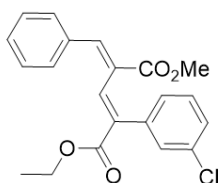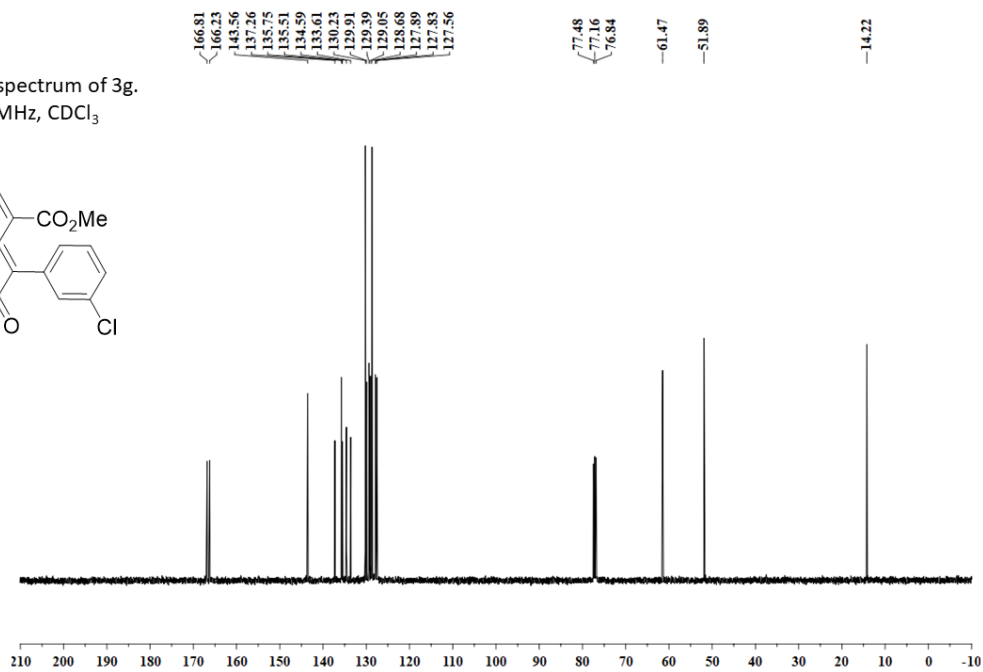

<sup>1</sup>H-NMR spectrum of 3h.  
400 MHz, CDCl<sub>3</sub>

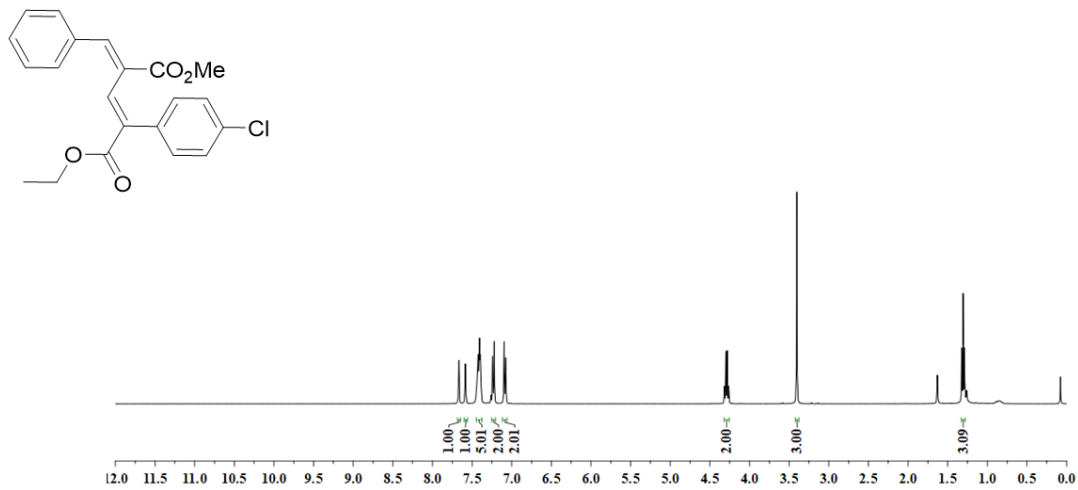

<sup>13</sup>C-NMR spectrum of 3h.  
100 MHz, CDCl<sub>3</sub>

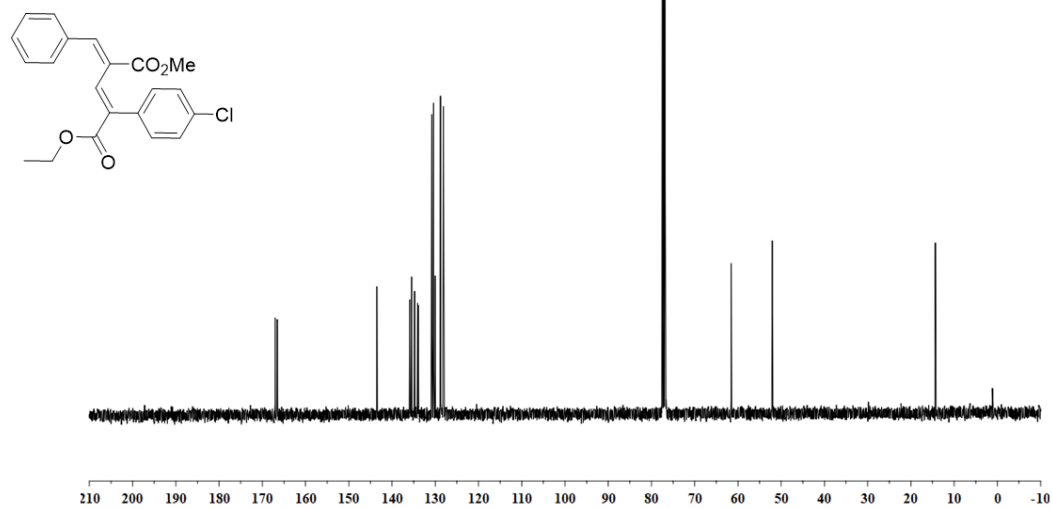

<sup>1</sup>H-NMR spectrum of 3i.  
400 MHz, CDCl<sub>3</sub>

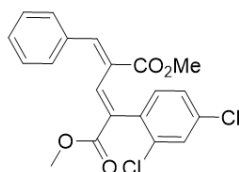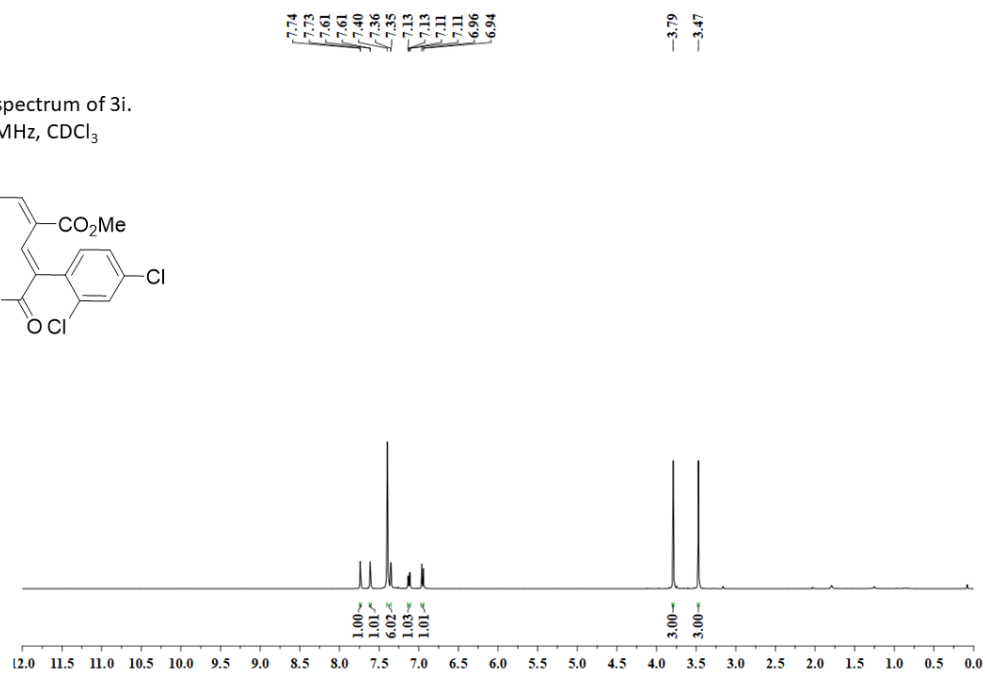

<sup>13</sup>C-NMR spectrum of 3i.  
100 MHz, CDCl<sub>3</sub>

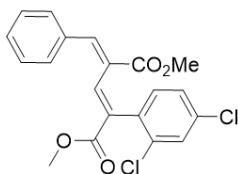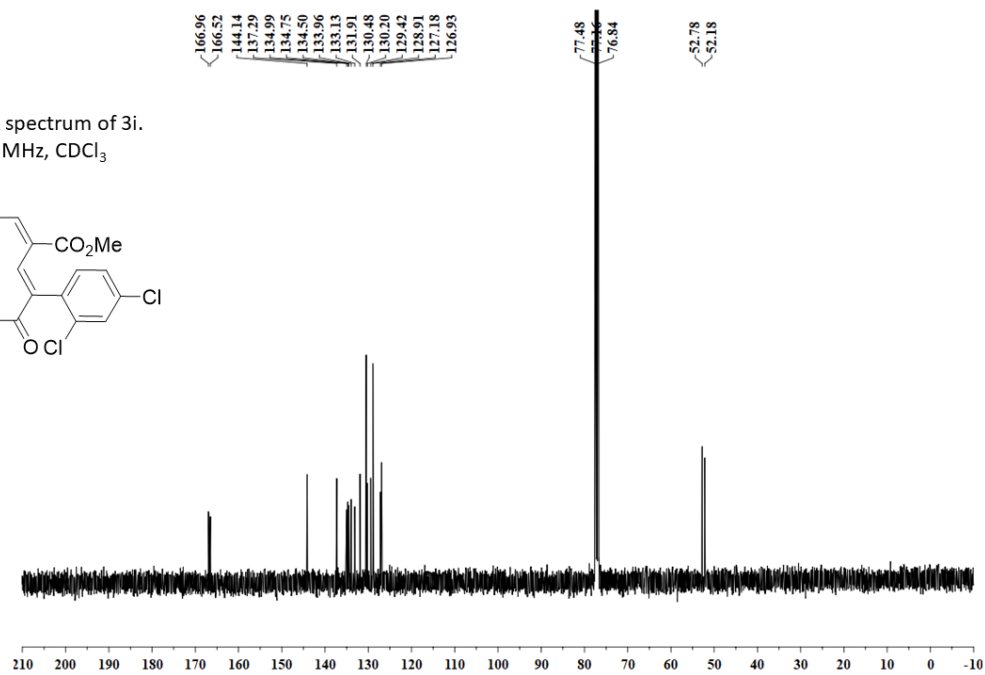

<sup>1</sup>H-NMR spectrum of 3j.  
400 MHz, CDCl<sub>3</sub>

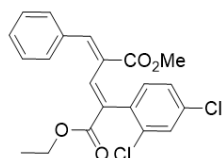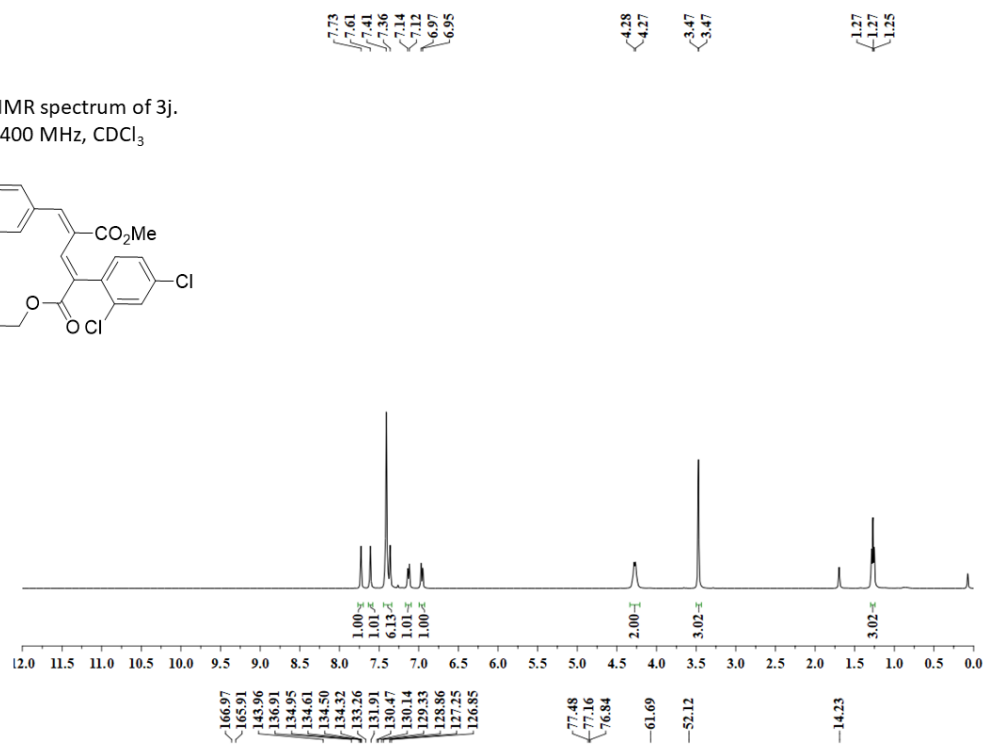

<sup>13</sup>C-NMR spectrum of 3j.  
100 MHz, CDCl<sub>3</sub>

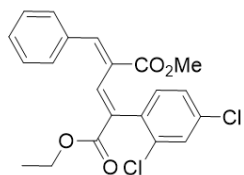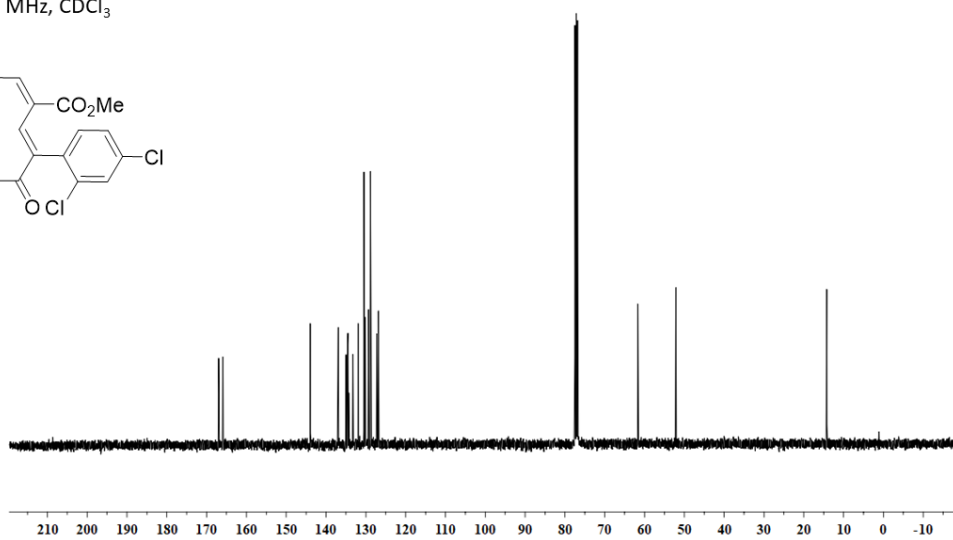

<sup>1</sup>H-NMR spectrum of 3k.  
400 MHz, CDCl<sub>3</sub>

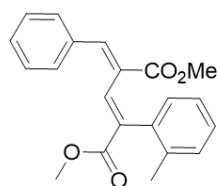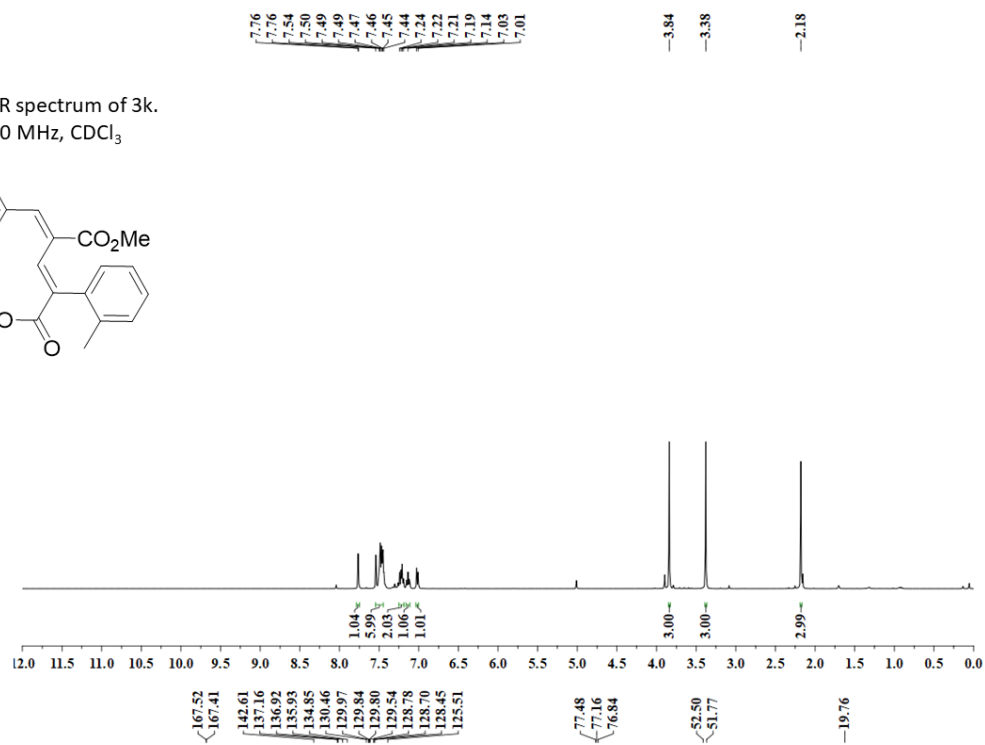

<sup>13</sup>C-NMR spectrum of 3k.  
100 MHz, CDCl<sub>3</sub>

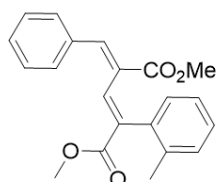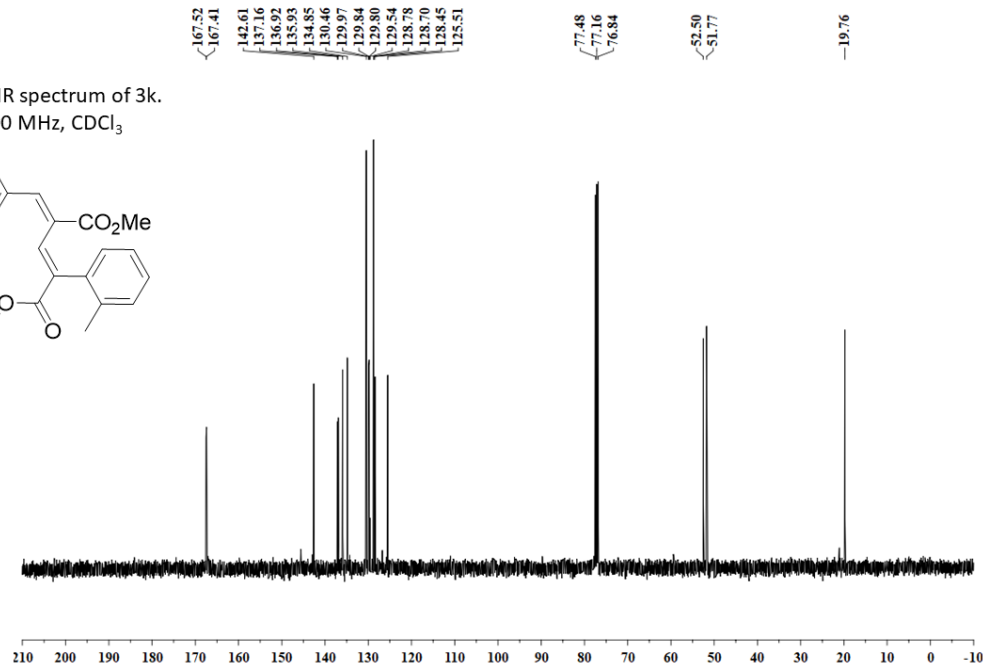

<sup>1</sup>H-NMR spectrum of 3l.  
400 MHz, CDCl<sub>3</sub>

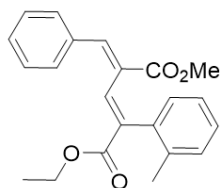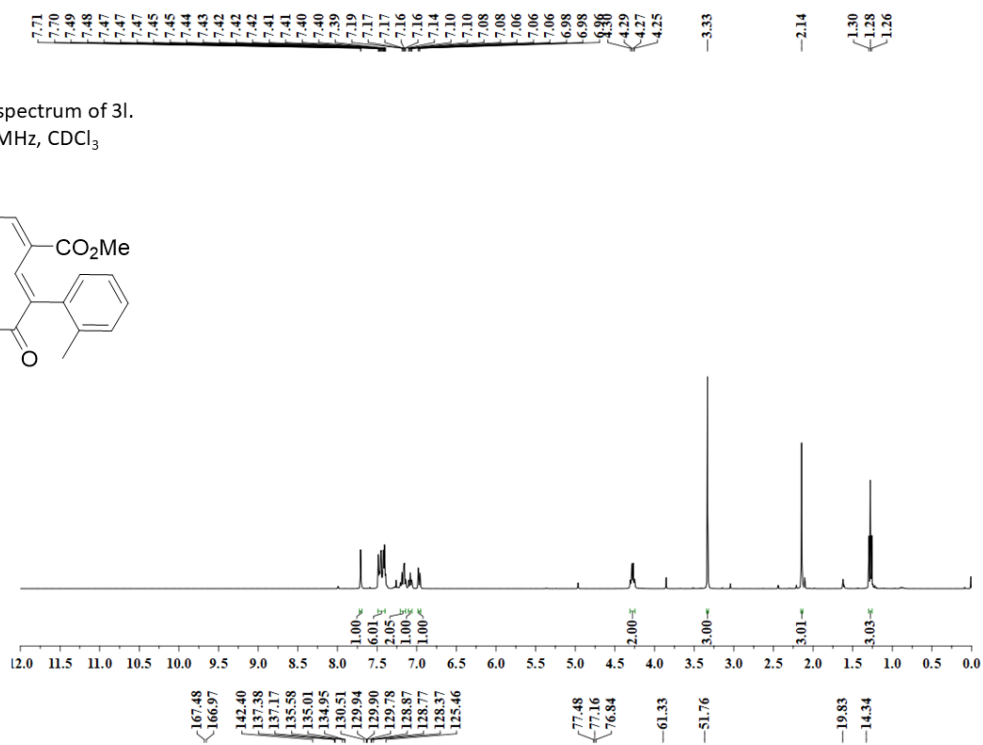

<sup>13</sup>C-NMR spectrum of 3l.  
100 MHz, CDCl<sub>3</sub>

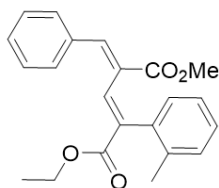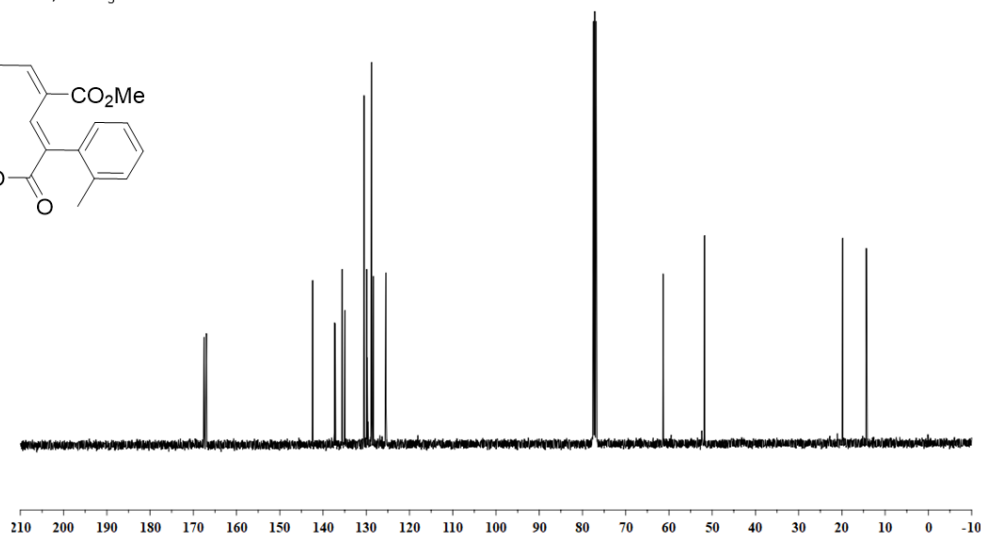

<sup>1</sup>H-NMR spectrum of 3m.  
400 MHz, CDCl<sub>3</sub>

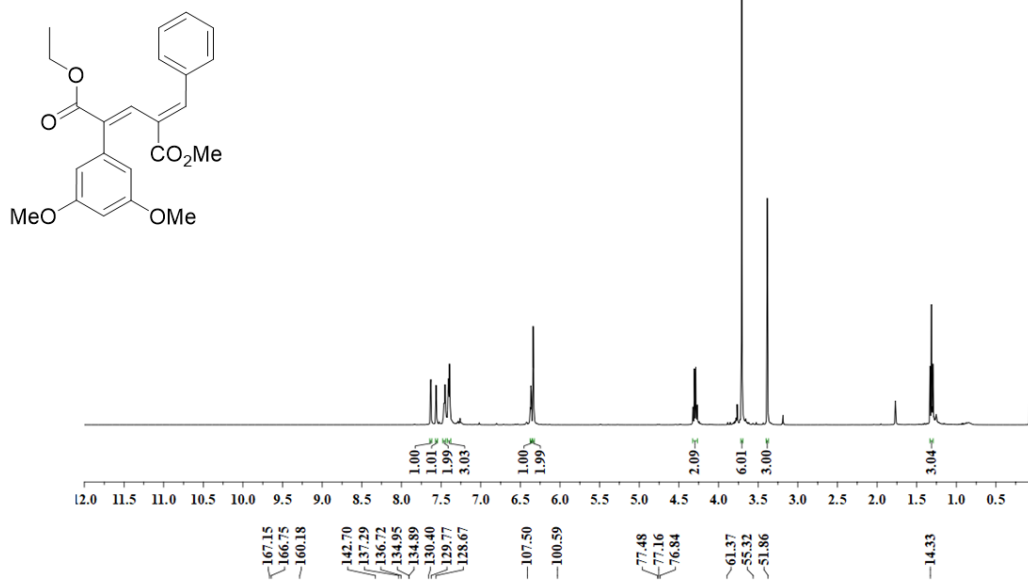

<sup>13</sup>C-NMR spectrum of 3m.  
100 MHz, CDCl<sub>3</sub>

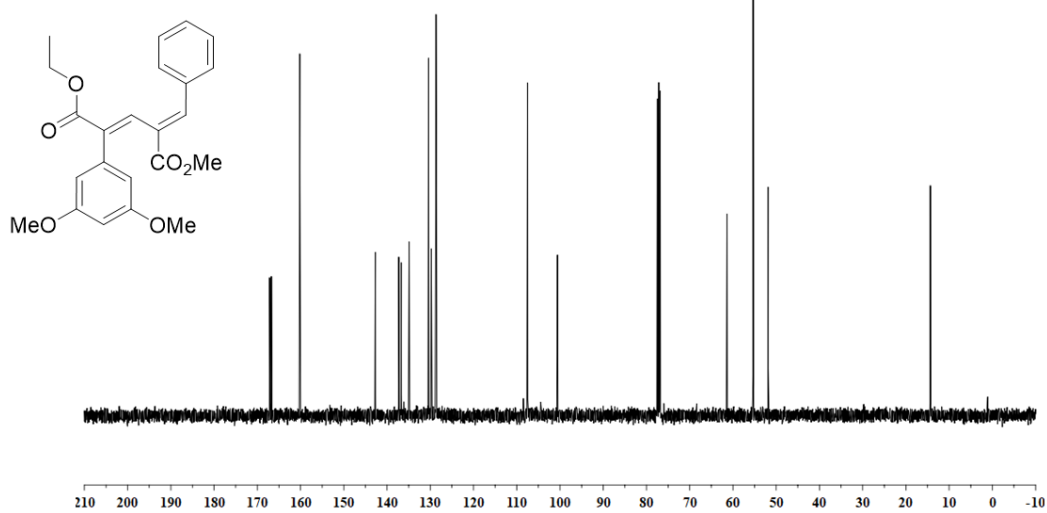



<sup>1</sup>H-NMR spectrum of 4a.  
400 MHz, CDCl<sub>3</sub>

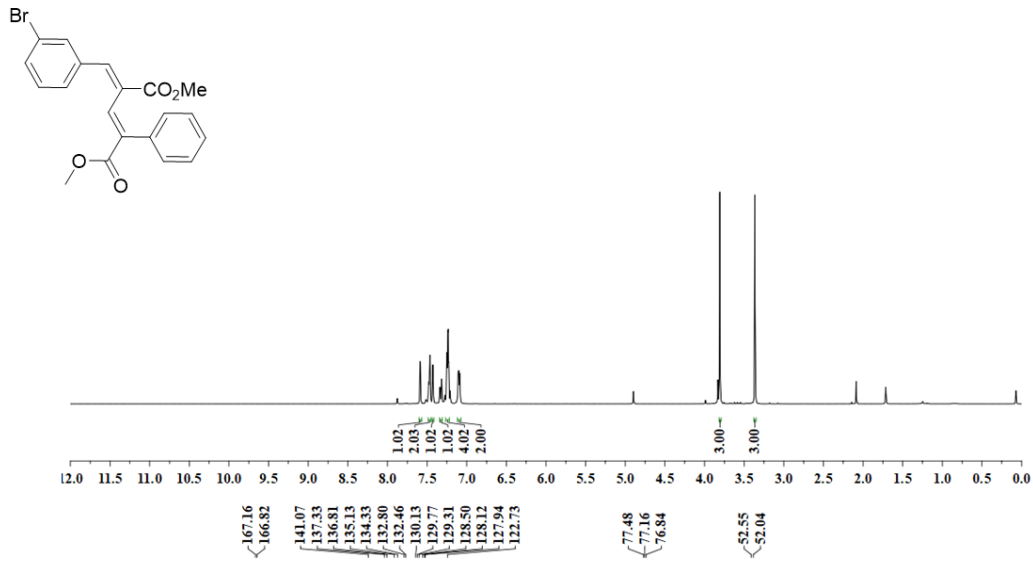

<sup>13</sup>C-NMR spectrum of 4a.  
100 MHz, CDCl<sub>3</sub>

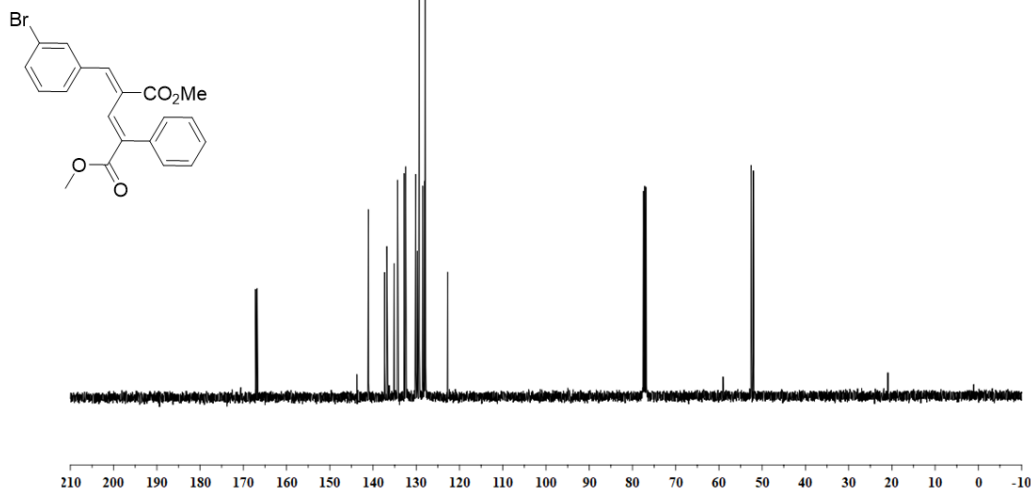

<sup>1</sup>H-NMR spectrum of 4b.  
400 MHz, CDCl<sub>3</sub>

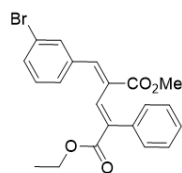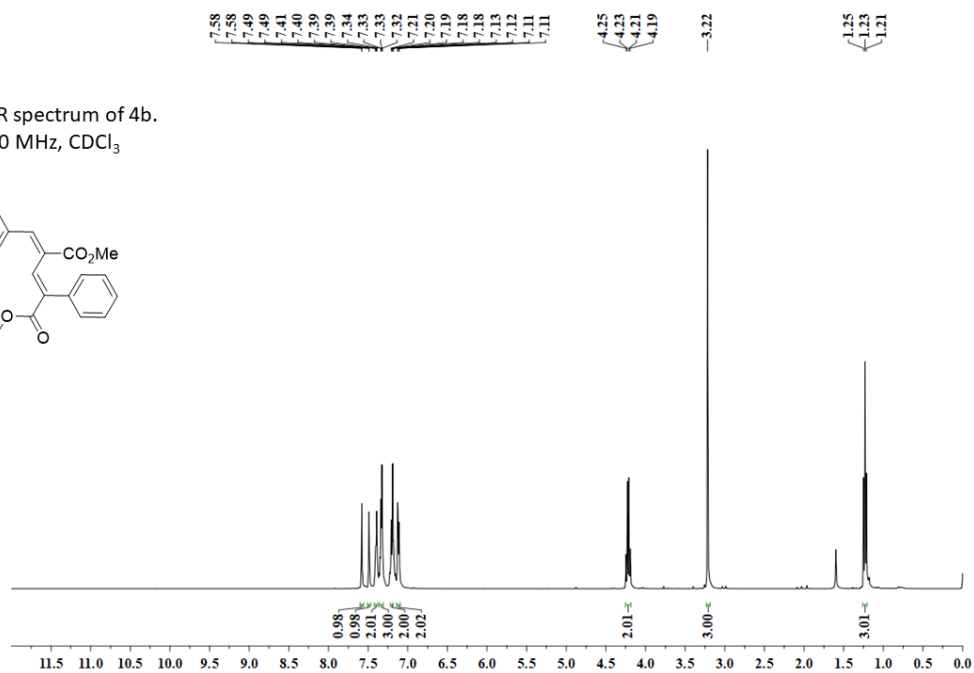

<sup>13</sup>C-NMR spectrum of 4b.  
100 MHz, CDCl<sub>3</sub>

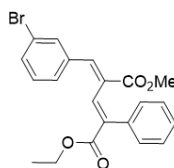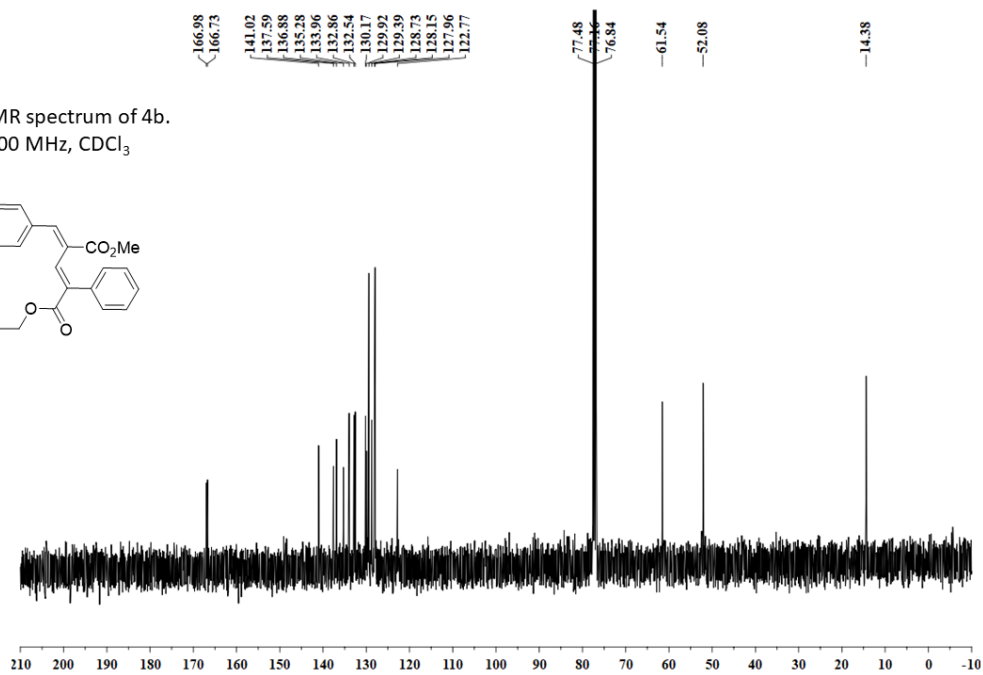

<sup>1</sup>H-NMR spectrum of 4c.  
400 MHz, CDCl<sub>3</sub>

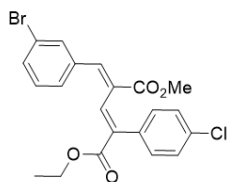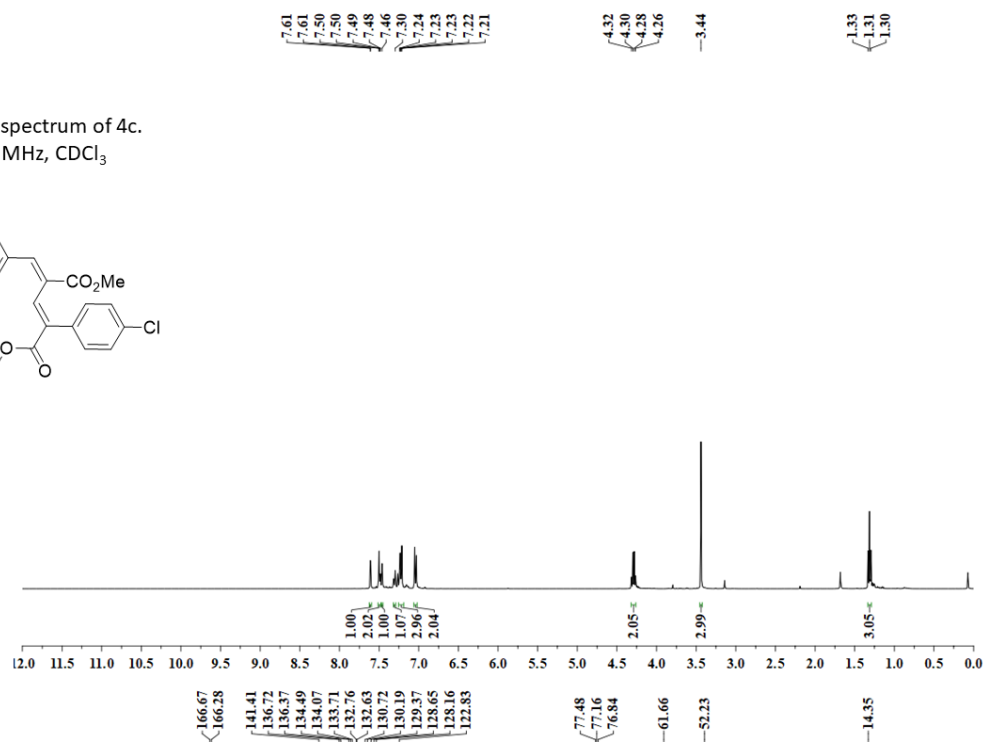

<sup>13</sup>C-NMR spectrum of 4c.  
100 MHz, CDCl<sub>3</sub>

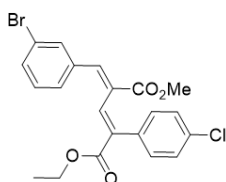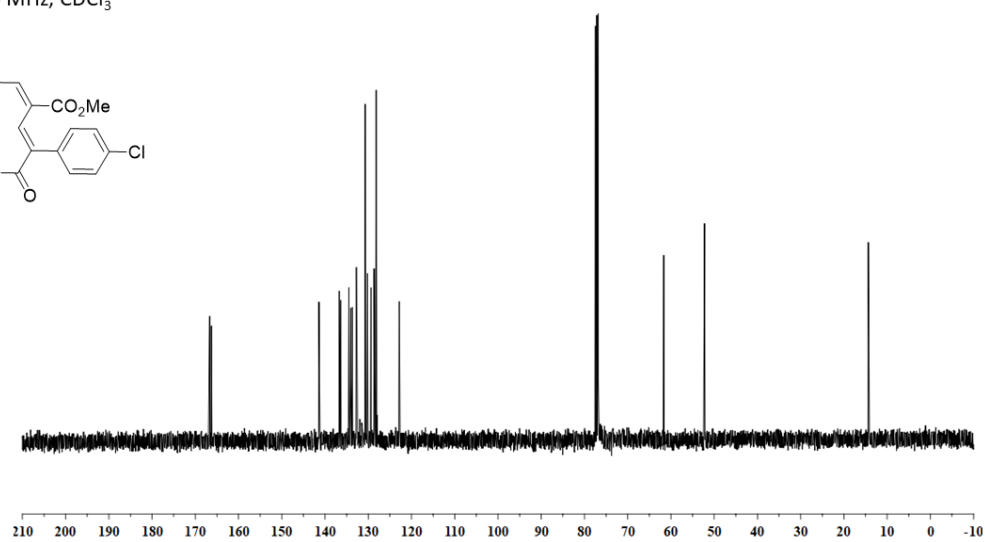

<sup>1</sup>H-NMR spectrum of 4d.  
400 MHz, CDCl<sub>3</sub>

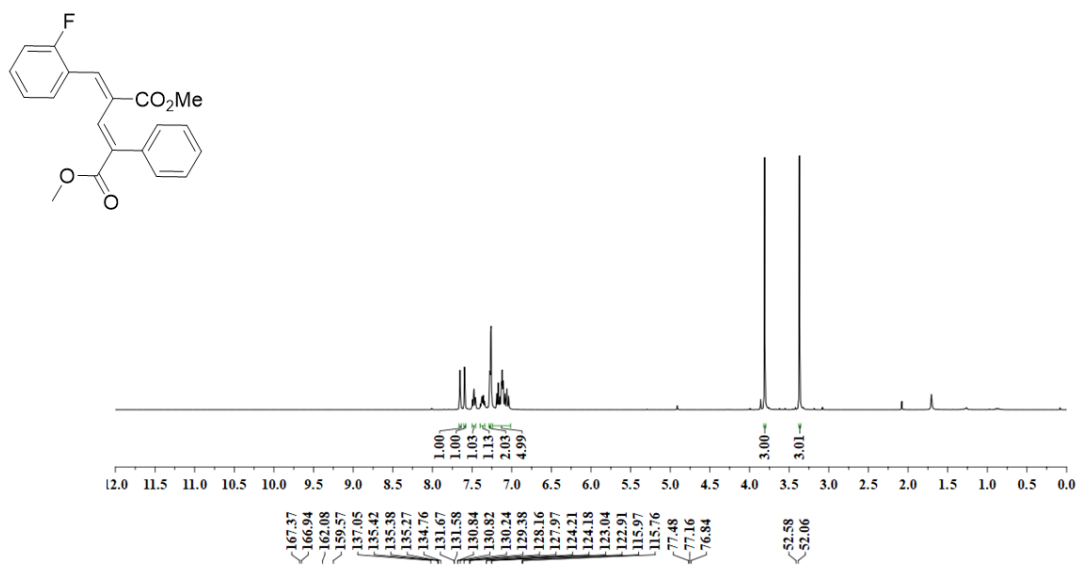

<sup>13</sup>C-NMR spectrum of 4d.  
100 MHz, CDCl<sub>3</sub>

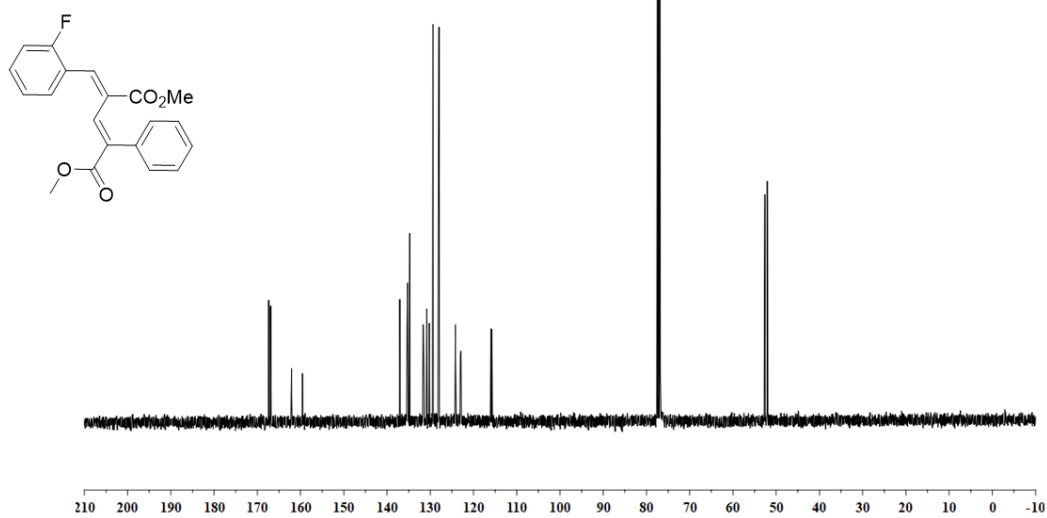

<sup>1</sup>H-NMR spectrum of 4e.  
400 MHz, CDCl<sub>3</sub>

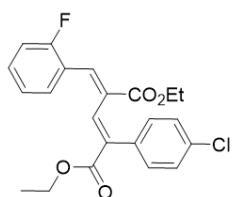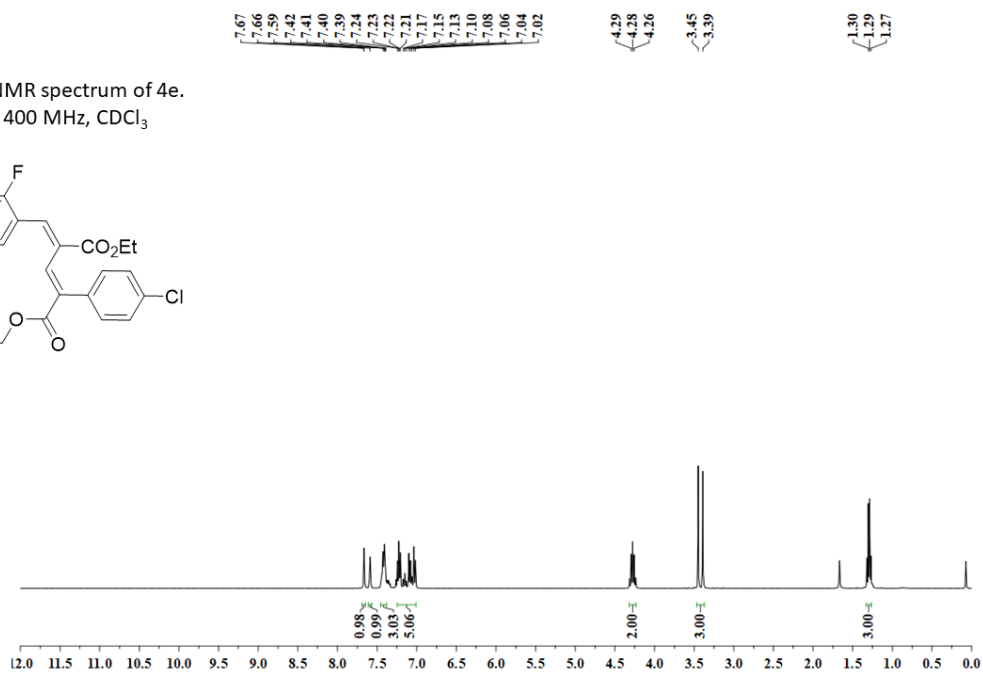

<sup>13</sup>C-NMR spectrum of 4e.  
100 MHz, CDCl<sub>3</sub>

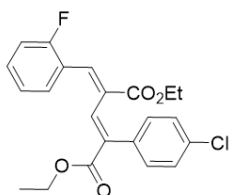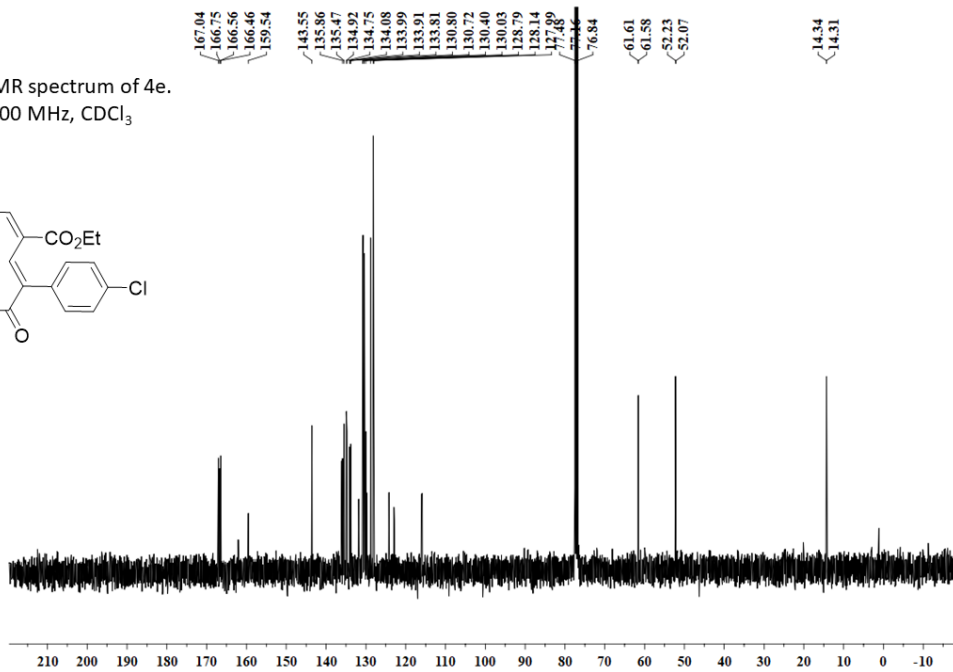

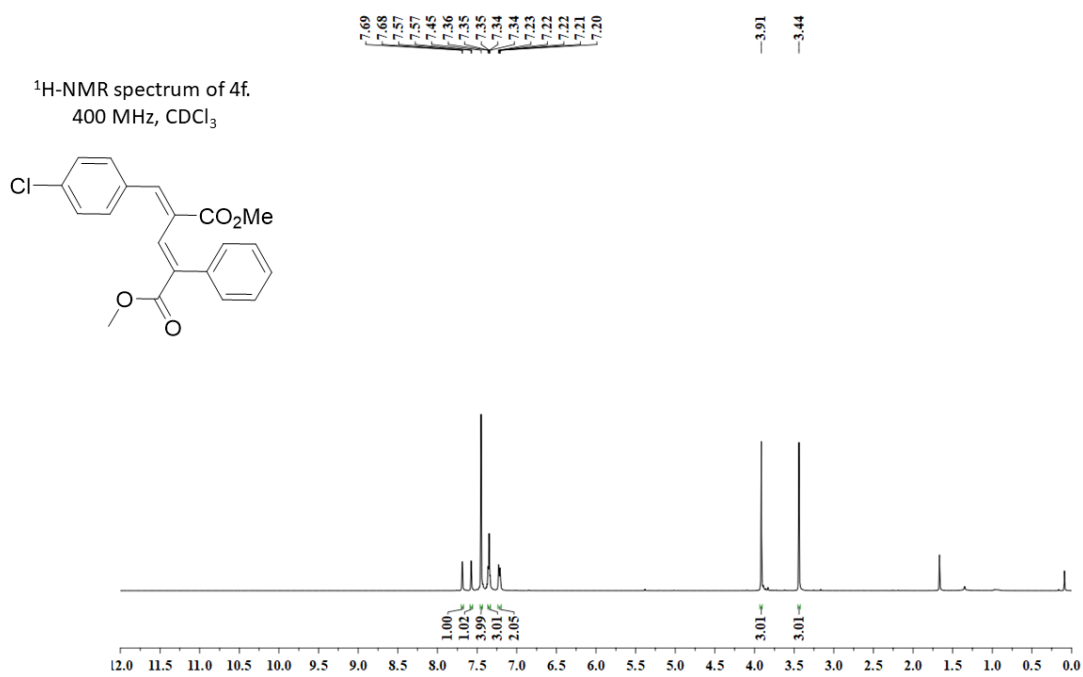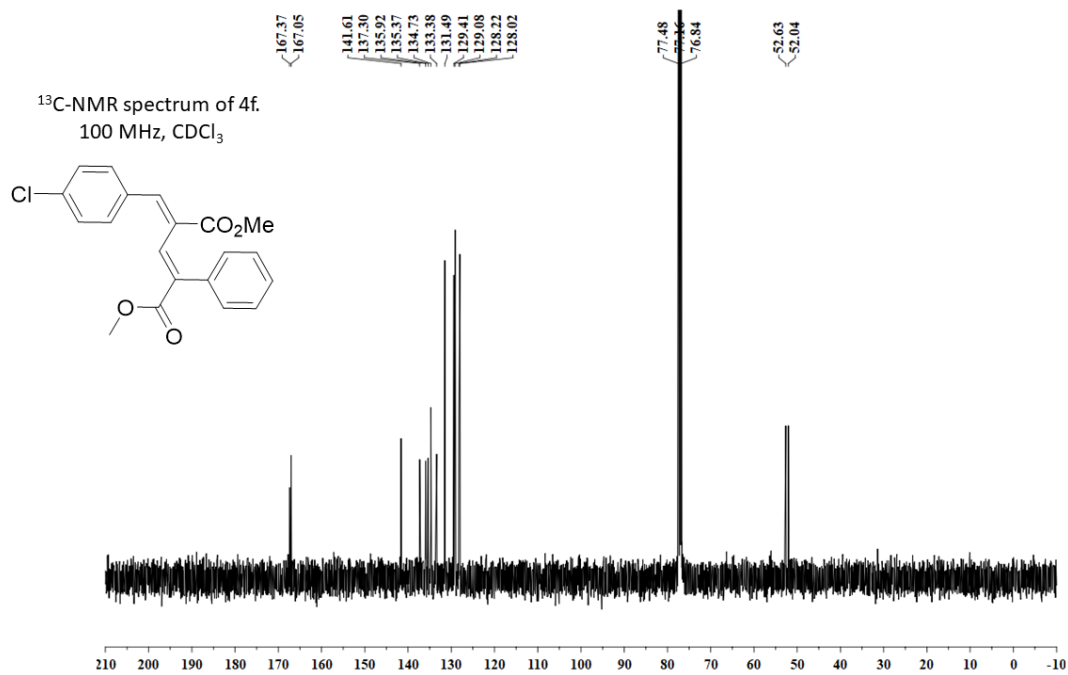

<sup>1</sup>H-NMR spectrum of 4g.  
400 MHz, CDCl<sub>3</sub>

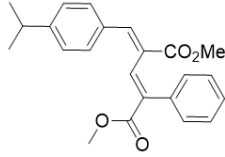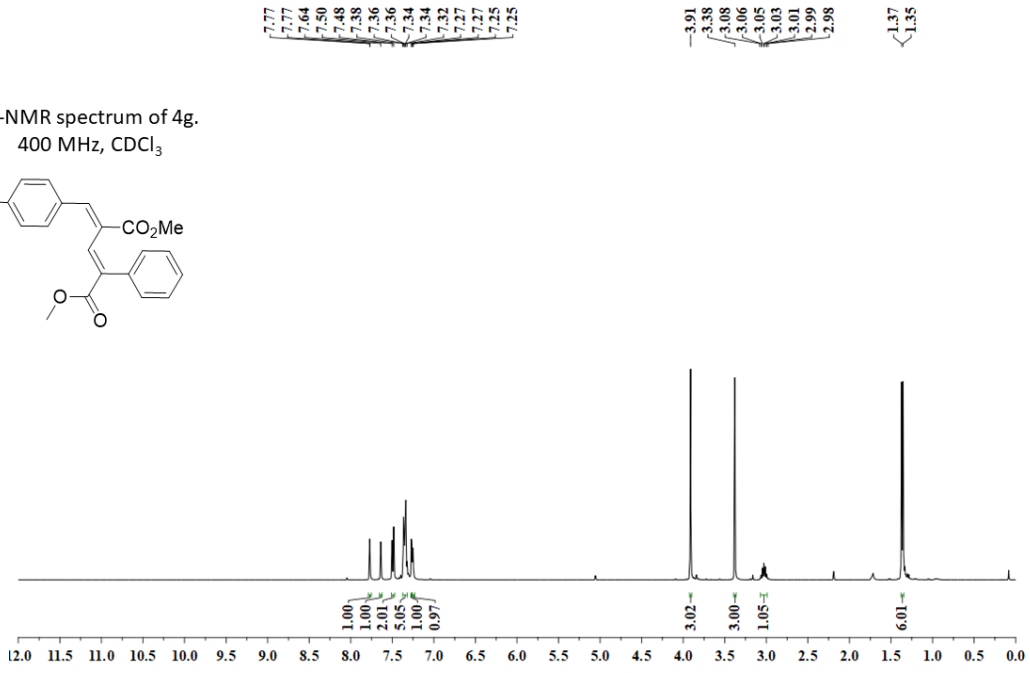

<sup>13</sup>C-NMR spectrum of 4g.  
100 MHz, CDCl<sub>3</sub>

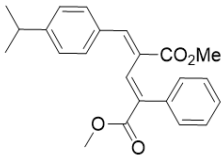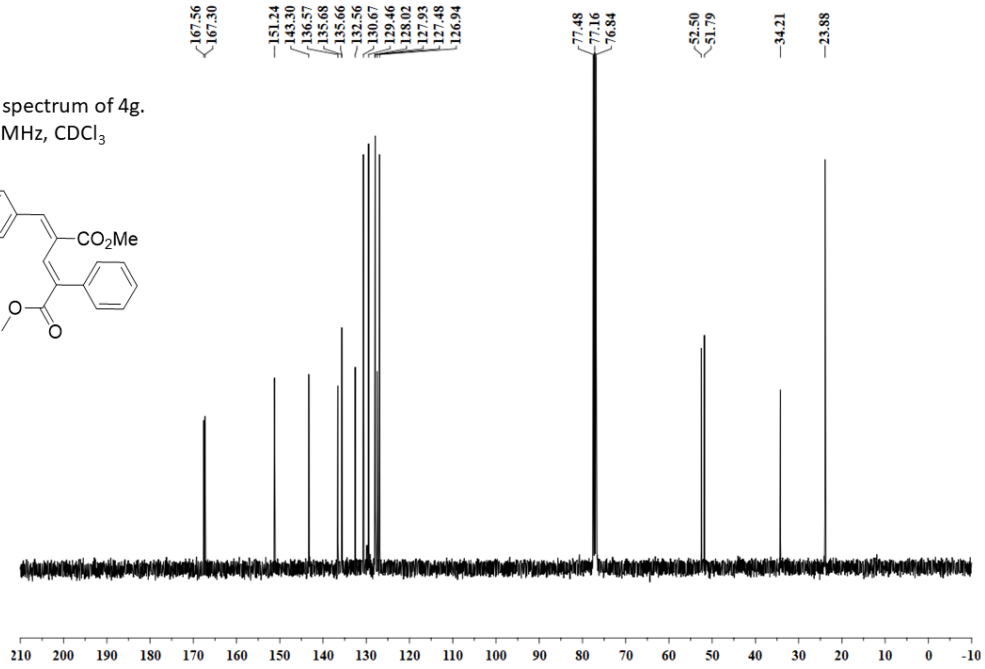

<sup>1</sup>H-NMR spectrum of 4h.  
400 MHz, CDCl<sub>3</sub>

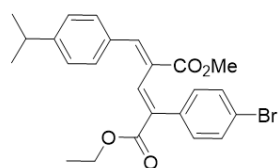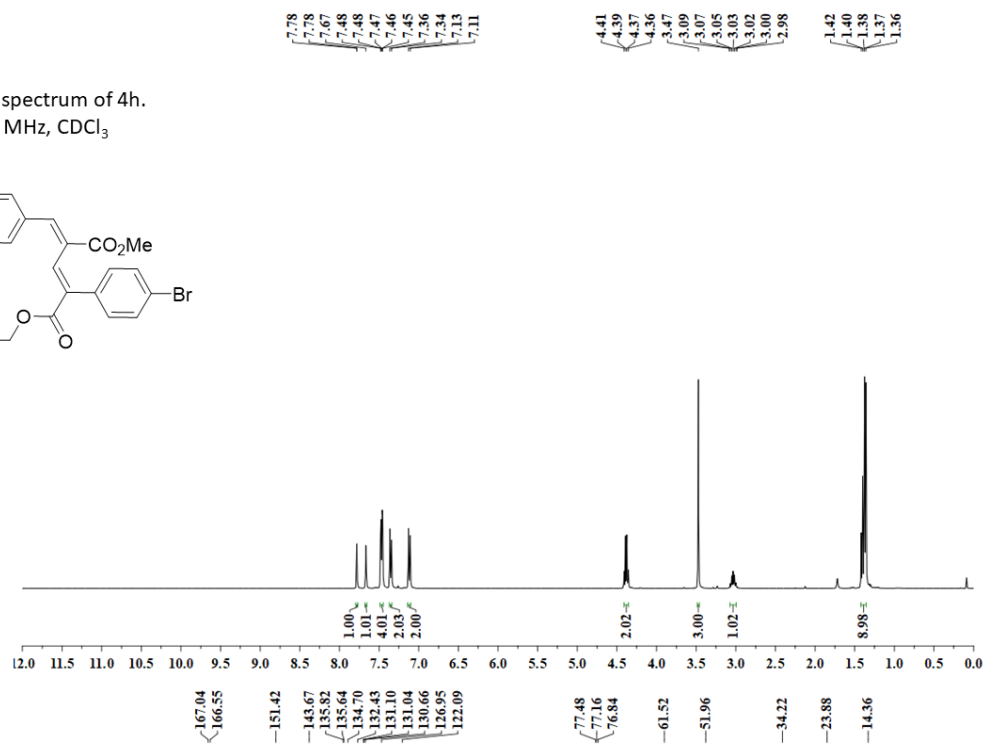

<sup>13</sup>C-NMR spectrum of 4h.  
100 MHz, CDCl<sub>3</sub>

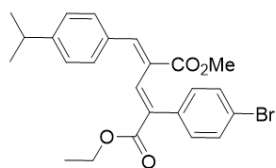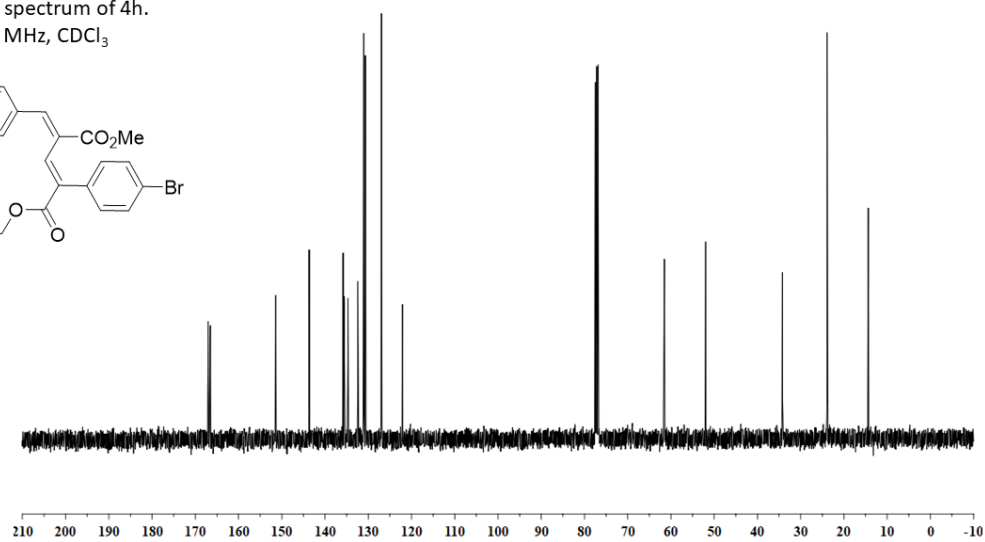



<sup>1</sup>H-NMR spectrum of 4i.  
400 MHz, CDCl<sub>3</sub>

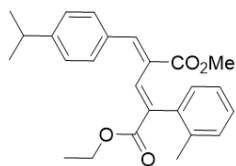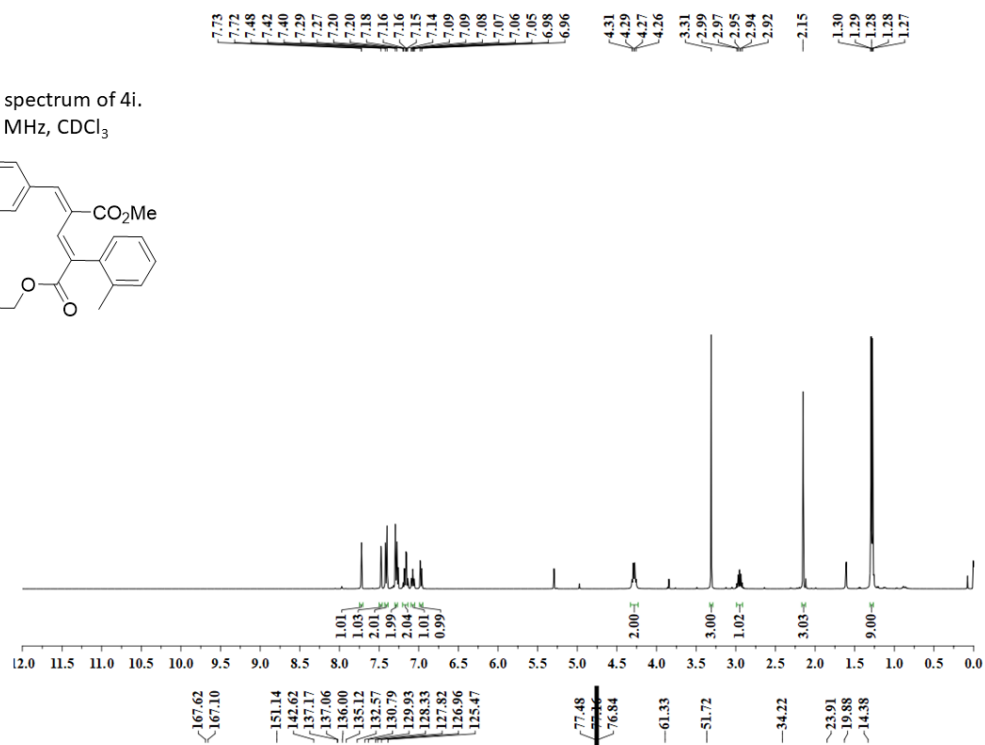

<sup>13</sup>C-NMR spectrum of 4i.  
100 MHz, CDCl<sub>3</sub>

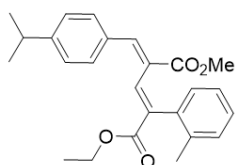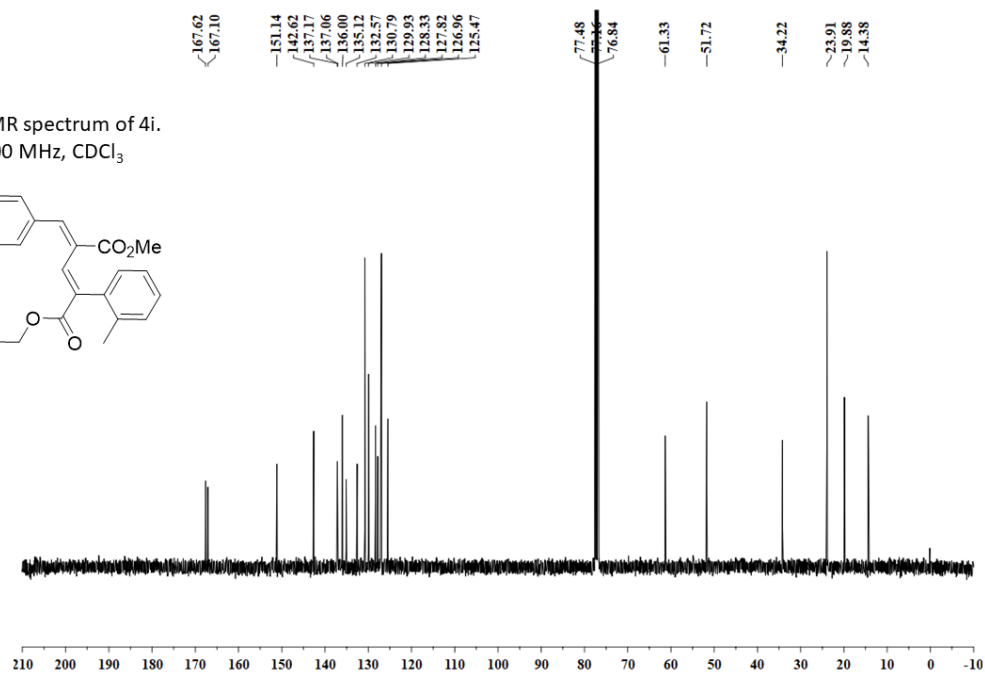

<sup>1</sup>H-NMR spectrum of 4j.  
400 MHz, CDCl<sub>3</sub>

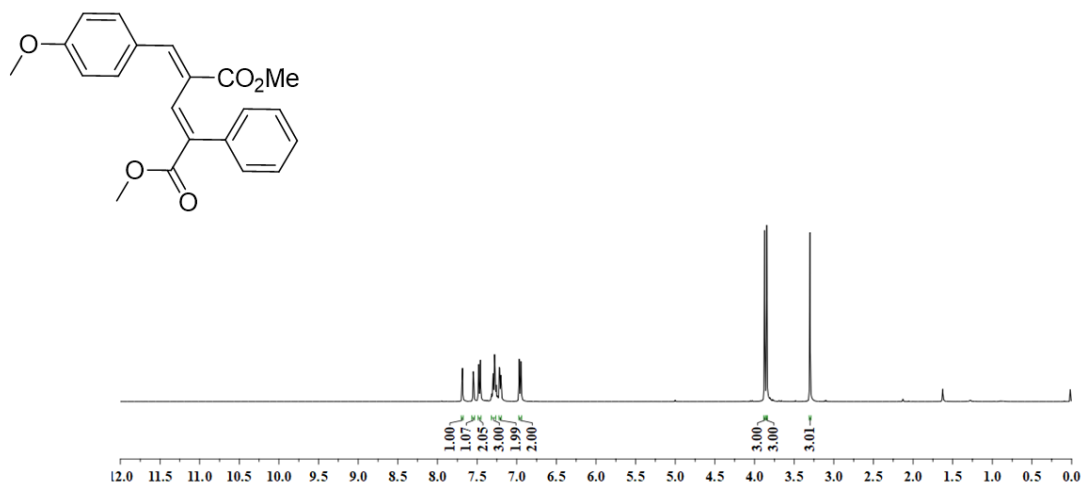

<sup>13</sup>C-NMR spectrum of 4j.  
100 MHz, CDCl<sub>3</sub>

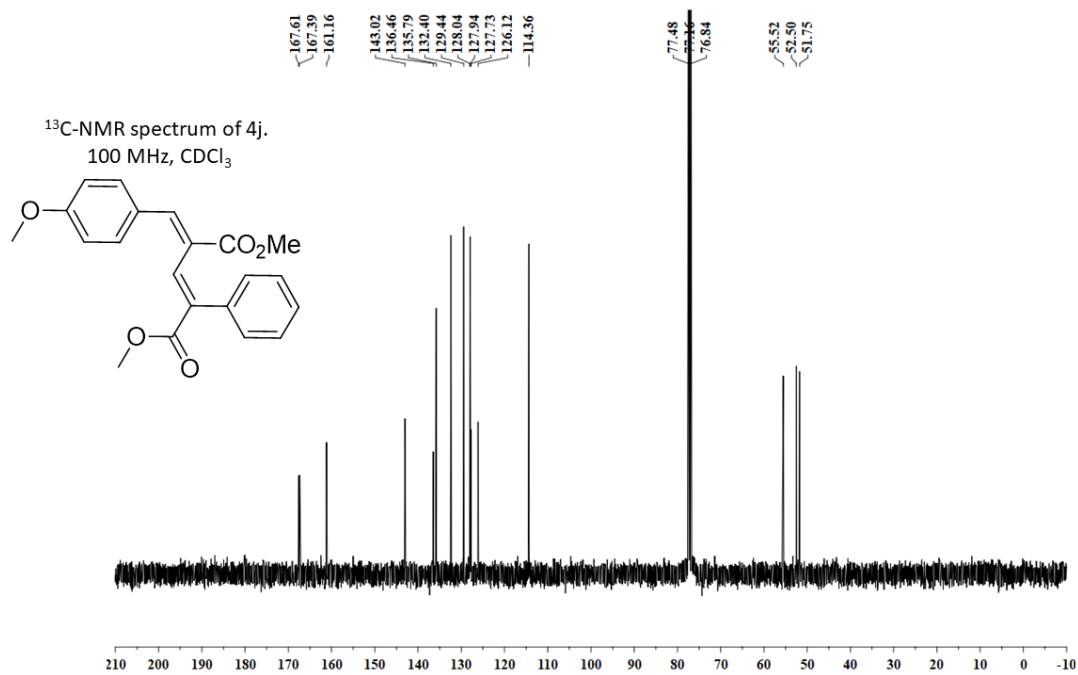

<sup>1</sup>H-NMR spectrum of 4k.  
400 MHz, CDCl<sub>3</sub>

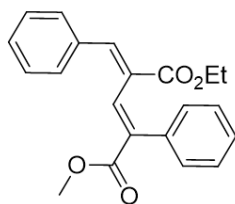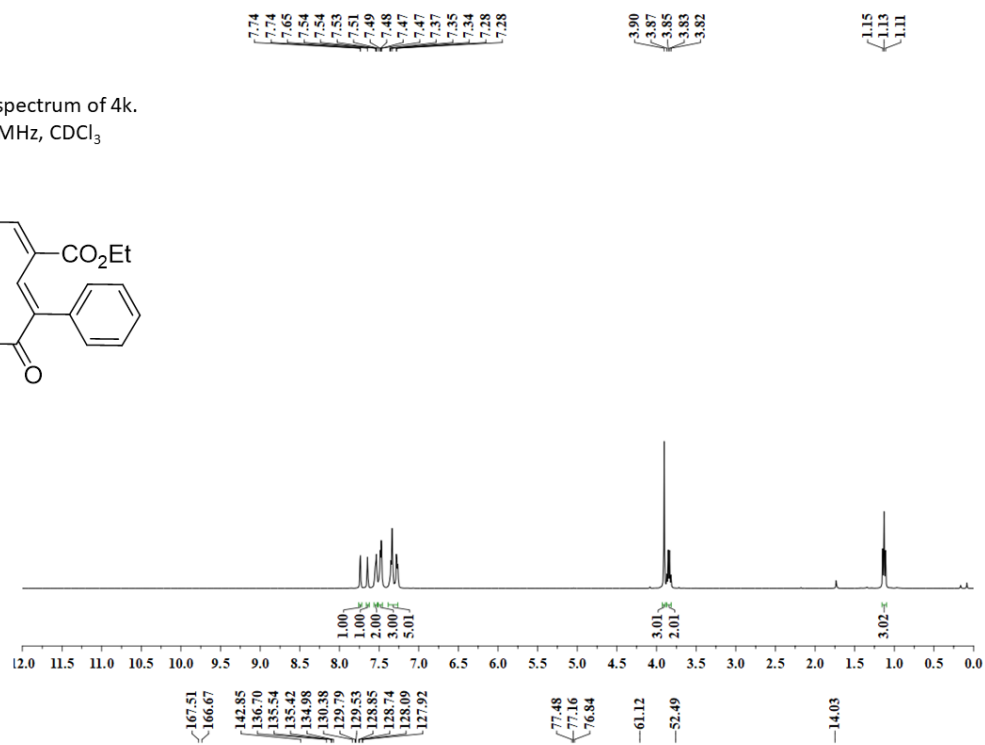

<sup>13</sup>C-NMR spectrum of 4k.  
100 MHz, CDCl<sub>3</sub>

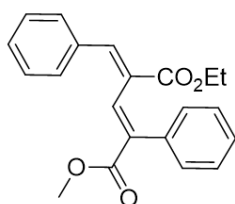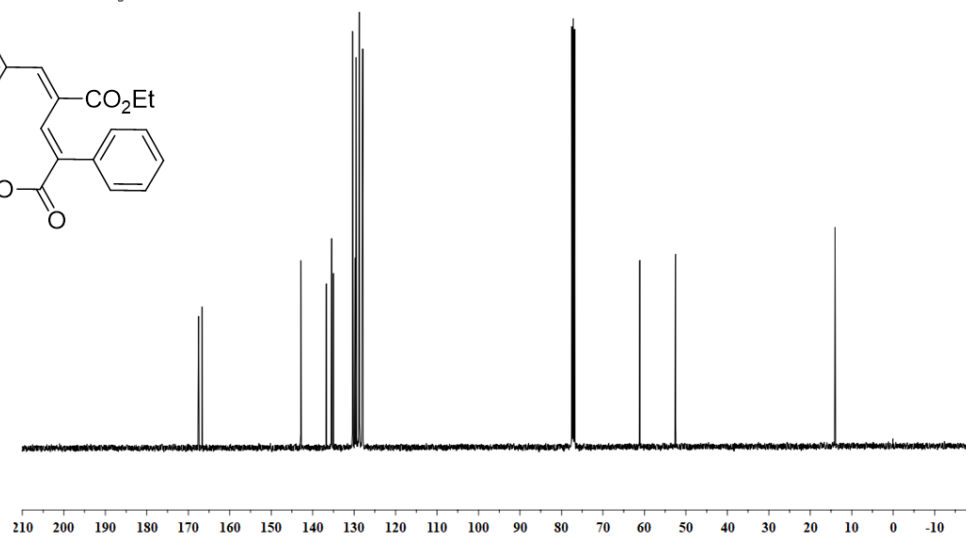

<sup>1</sup>H-NMR spectrum of 4l.  
400 MHz, CDCl<sub>3</sub>

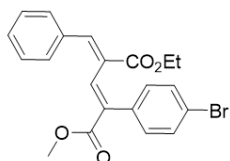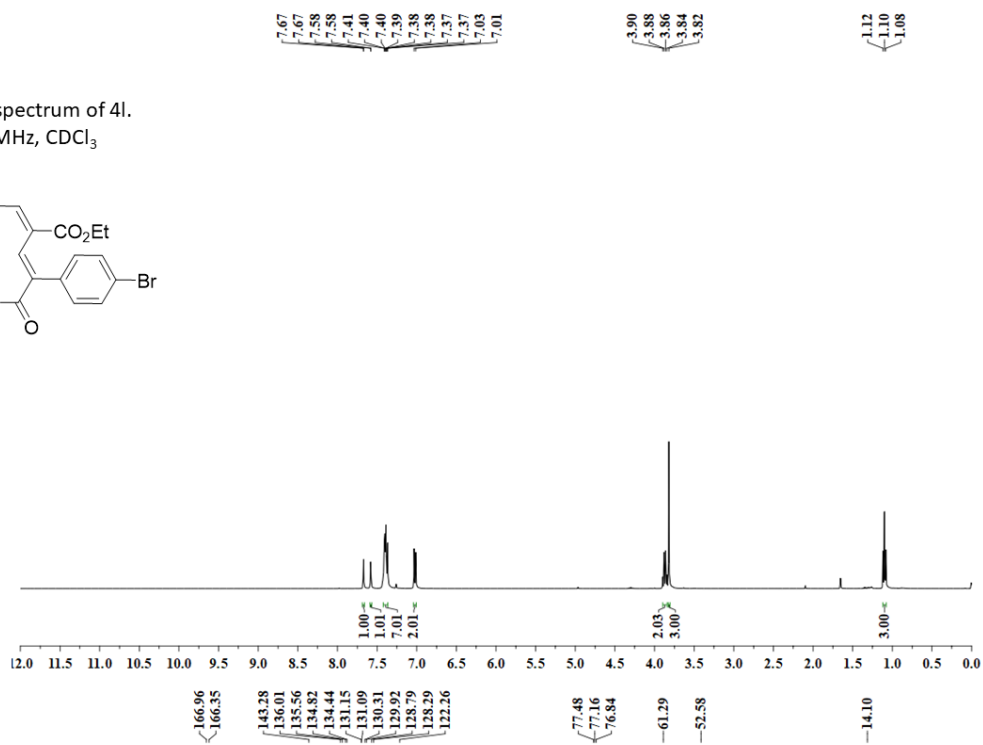

<sup>13</sup>C-NMR spectrum of 4l.  
100 MHz, CDCl<sub>3</sub>

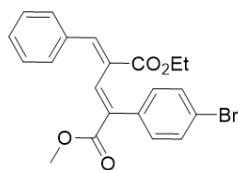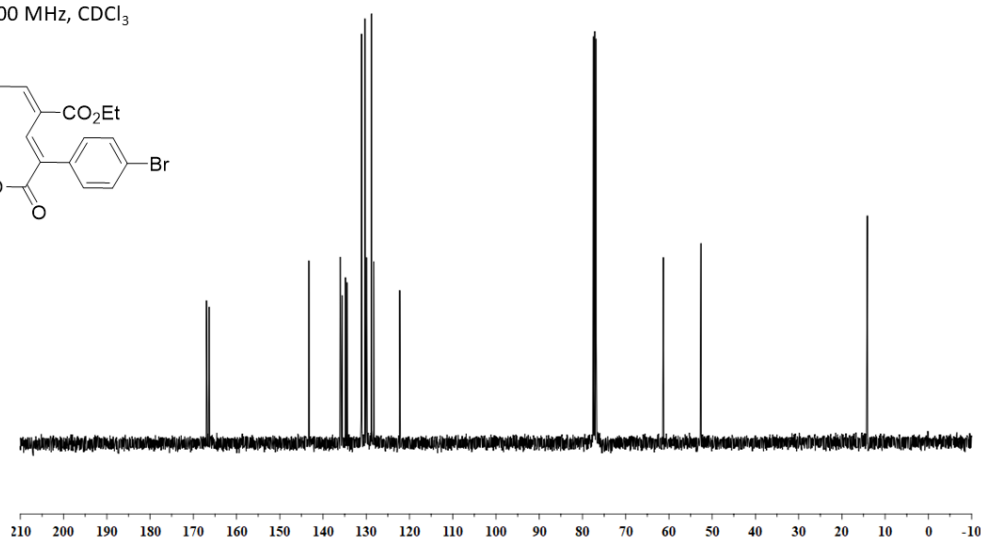

<sup>1</sup>H-NMR spectrum of 4m.  
400 MHz, CDCl<sub>3</sub>

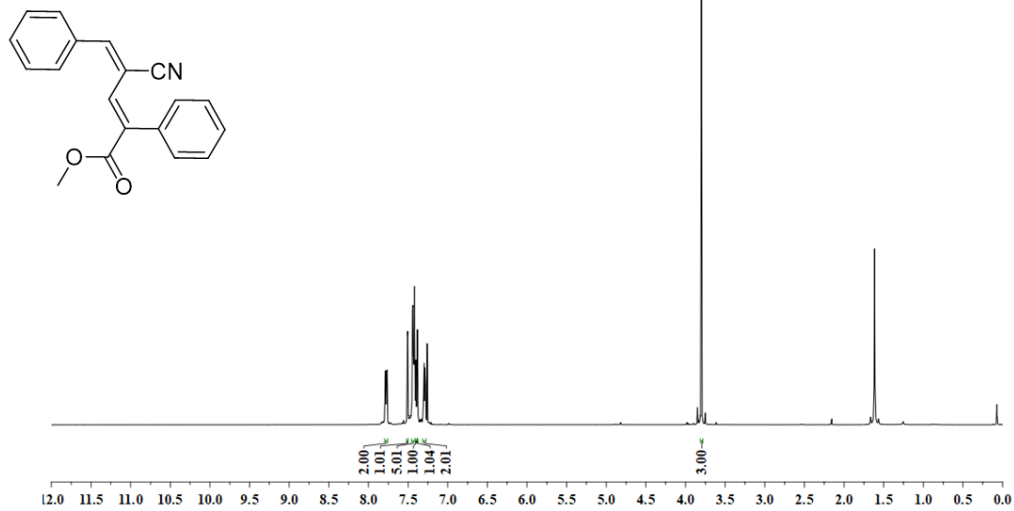

<sup>13</sup>C-NMR spectrum of 4m.  
100 MHz, CDCl<sub>3</sub>

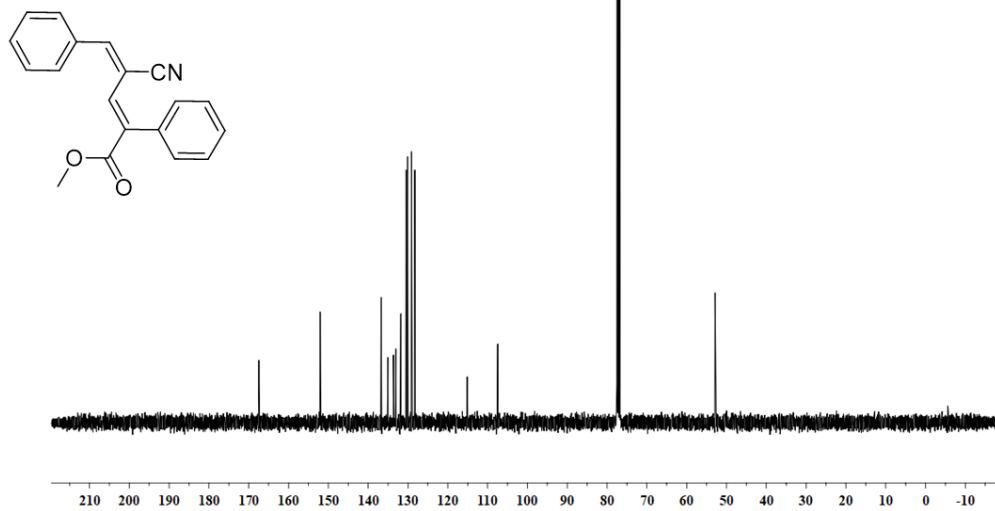

Supplement: d2nj03460c1.pdf [file d2nj03460c1.pdf]
